# Supplementary material for: Monoarsine-protected icosahedral cluster [Au13(AsPh3)8Cl4]+: comparative studies on ligand effect and surface reactivity with its stibine analogue
Source: Royal Society of Chemistry journal article supplement (doi:10.1039/d3sc01311a), 2023-01-01
Supplement: d3sc01311a1.pdf [file d3sc01311a1.pdf]

## Supporting Information

Jiu-Hong Yu,<sup>a</sup> Zhi-Rui Yuan,<sup>a</sup> Jing Xu,<sup>a</sup> Jin-Gui Wang,<sup>a</sup> Mohammad Azam,<sup>c</sup> Tian-Duo Li,<sup>a</sup> Ying-Zhou Li,<sup>\*a</sup> and Di Sun<sup>\*b</sup>

<sup>a</sup>*School of Chemistry and Chemical Engineering, Qilu University of Technology (Shandong Academy of Sciences), Ji'nan, 250353, P.R. China. E-mail: liyz@qlu.edu.cn*

<sup>b</sup>*School of Chemistry and Chemical Engineering, State Key Laboratory of Crystal Materials, Shandong University, Ji'nan, 250100, P.R. China. E-mail: [dsun@sdu.edu.cn](mailto:dsun@sdu.edu.cn)*

<sup>c</sup>*Department of Chemistry, College of Science, King Saud University, P. O. Box 2455, Riyadh 11451, Saudi Arabia.*

### Contents

#### Physical measurements and instrumentation

#### X-ray crystallography

#### DFT calculations

#### Experimental

**Figure S1.** Stacking diagram of the precursor complex (Ph<sub>3</sub>As)AuCl in the unit cell.

**Figure S2.** Ortep diagram showing the molecular structure of (Ph<sub>3</sub>As)<sub>3</sub>AuCl.

**Figure S3.** The two independent molecules of **Au<sub>13</sub>As<sub>8</sub>** in the unit cell and their stacking diagram.

**Figure S4.** <sup>31</sup>P{<sup>1</sup>H} NMR spectrum of **Au<sub>13</sub>As<sub>8</sub>** in CD<sub>2</sub>Cl<sub>2</sub> at room temperature.

**Figure S5.** Comparative IR spectra of crude and crystalline **Au<sub>13</sub>As<sub>8</sub>**.

**Figure S6.** <sup>1</sup>H NMR spectra of **Au<sub>13</sub>As<sub>8</sub>** in CD<sub>2</sub>Cl<sub>2</sub> at room temperature.

**Figure S7.** Experimental UV-vis spectra of **Au<sub>13</sub>As<sub>8</sub>**, **Au<sub>13</sub>Sb<sub>8</sub>**, [Au<sub>13</sub>(PPh<sub>2</sub>Me)<sub>8</sub>Cl<sub>4</sub>]<sup>+</sup>, [Au<sub>13</sub>(dppp)<sub>4</sub>Cl<sub>4</sub>]<sup>+</sup> and [Au<sub>13</sub>(PR<sub>3</sub>)<sub>8</sub>Cl<sub>4</sub>]<sup>+</sup> (R = CH<sub>2</sub>CH<sub>2</sub>CO<sub>2</sub>CH<sub>3</sub>), and correlations between ligands and absorptions.

**Figure S8.** Experimental and TD-DFT calculated UV-vis spectra of **Au<sub>13</sub>As<sub>8</sub>**.

**Figure S9.** Experimental and TD-DFT calculated UV-vis spectra of **Au<sub>13</sub>Sb<sub>8</sub>**.

**Figure S10.** Photoluminescence spectra for **Au<sub>13</sub>As<sub>8</sub>** (magenta line, λ<sub>ex</sub> = 460 nm) and **Au<sub>13</sub>Sb<sub>8</sub>** (cyan line, λ<sub>ex</sub> = 470 nm) in crystalline state at room temperature.

**Figure S11.** UV-vis monitoring spectra of **Au<sub>13</sub>As<sub>8</sub>** in CH<sub>2</sub>Cl<sub>2</sub> stored in dark at 4 °C.

**Figure S12.** TGA comparison curves of **Au<sub>13</sub>As<sub>8</sub>** and **Au<sub>13</sub>Sb<sub>8</sub>**.

**Figure S13.** UV-vis spectrum of the recovered **Au<sub>13</sub>As<sub>8</sub>** in DCM after five cycles.

**Figure S14.** <sup>1</sup>H NMR spectra of the crudes in CD<sub>2</sub>Cl<sub>2</sub> for A<sup>3</sup> coupling reactions catalyzed by **Au<sub>13</sub>As<sub>8</sub>** and **Au<sub>13</sub>Sb<sub>8</sub>**.

**Figure S15.** The NMR yields of propargylamine for the A<sup>3</sup> coupling reactions catalyzed by **Au<sub>13</sub>As<sub>8</sub>** and **Au<sub>13</sub>Sb<sub>8</sub>**.

**Figure S16.** Photographs of the crystals of [Au<sub>11</sub>(PPh<sub>3</sub>)<sub>8</sub>Cl<sub>2</sub>]<sup>+</sup> and [Au<sub>13</sub>(dppe)<sub>5</sub>Cl<sub>2</sub>]<sup>3+</sup>.

**Figure S17.** UV-vis spectrum of [Au<sub>11</sub>(PPh<sub>3</sub>)<sub>8</sub>Cl<sub>2</sub>]<sup>+</sup> in CH<sub>2</sub>Cl<sub>2</sub>.

**Figure S18.** <sup>1</sup>H{<sup>31</sup>P} NMR spectrum of [Au<sub>11</sub>(PPh<sub>3</sub>)<sub>8</sub>Cl<sub>2</sub>]<sup>+</sup> in CD<sub>2</sub>Cl<sub>2</sub>.

**Figure S19.** UV-vis spectrum of [Au<sub>13</sub>(dppe)<sub>5</sub>Cl<sub>2</sub>]<sup>3+</sup> in CH<sub>2</sub>Cl<sub>2</sub>.

**Figure S20.** ESI-MS(+) spectrum of [Au<sub>13</sub>(dppe)<sub>5</sub>Cl<sub>2</sub>]<sup>3+</sup> in CH<sub>2</sub>Cl<sub>2</sub>.

**Table S1.** Crystallographic Data for **Au<sub>13</sub>As<sub>8</sub>** and (Ph<sub>3</sub>As)<sub>3</sub>AuCl.

**Table S2.** Selected bond distances (Å) for crystallographic **Au<sub>13</sub>As<sub>8</sub>** and **Au<sub>13</sub>Sb<sub>8</sub>**.

**Table S3.** Selected bond distances (Å) for structurally optimized **Au<sub>13</sub>As<sub>8</sub>** and **Au<sub>13</sub>Sb<sub>8</sub>**.

**Table S4.** Selected orbitals of **Au<sub>13</sub>As<sub>8</sub>** and elemental contribution ratios (%).

**Table S5.** Selected orbitals of **Au<sub>13</sub>Sb<sub>8</sub>** and elemental contribution ratios (%).

**Table S6.** Selected excited states, energy, oscillator strength, and the most probable transitions of **Au<sub>13</sub>As<sub>8</sub>** from TD-DFT calculations.

**Table S7.** Selected excited states, energy, oscillator strength, and the most probable transitions of **Au<sub>13</sub>Sb<sub>8</sub>** from TD-DFT calculations.

**Table S8.** Cartesian coordinates of optimized **Au<sub>13</sub>As<sub>8</sub>** and **Au<sub>13</sub>Sb<sub>8</sub>**.

**Table S9.** Natural Population charges for **Au<sub>13</sub>As<sub>8</sub>** and **Au<sub>13</sub>Sb<sub>8</sub>**.

**Table S10.** Mulliken charges for **Au<sub>13</sub>As<sub>8</sub>** and **Au<sub>13</sub>Sb<sub>8</sub>**.

**Table S11.** Selected Second Order Perturbation theory analysis of Fock matrix in NBO basis for **Au<sub>13</sub>As<sub>8</sub>**.

**Table S12.** Selected Second Order Perturbation theory analysis of Fock matrix in NBO basis for **Au<sub>13</sub>Sb<sub>8</sub>**.

**Table S13.** Selected Wiberg bond indices in the NAO basis for **Au<sub>13</sub>As<sub>8</sub>** and **Au<sub>13</sub>Sb<sub>8</sub>**.

## Physical measurements and instrumentation

The UV-Vis spectra were recorded on a Thermo Scientific Evolution 220 UV-visible spectrophotometer. Photoluminescence measurements were carried out in an Edinburgh spectrophotometer (F920S). Mass spectra were recorded on an Agilent 6224 ESI-TOF-MS spectrometer; Sample solutions are infused by a syringe pump at 4  $\mu\text{L}/\text{min}$ . Data were acquired using the following settings: ESI capillary voltage was set at 6000 V (+) ion mode and fragmentor at 200 V. The liquid nebulizer was set to 15 psig and the nitrogen drying gas was set to a flow rate of 4 L/min; the data analyses of mass spectra were performed based on the isotope distribution patterns using Agilent MassHunter Workstation Data acquisition software (Version B.05.00); the reported  $m/z$  values represent monoisotopic mass of the most abundant peak within the isotope pattern. Infrared spectrum was recorded on a PerkinElmer Spectrum Two in the frequency range of 4000-400  $\text{cm}^{-1}$ . TGA measurement was performed on a TGA-Q500 thermogravimetric analyzer at a heating rate of 10  $^{\circ}\text{C}/\text{min}$  under  $\text{N}_2$  purge (60 mL/min).  $^1\text{H}$  and  $^{31}\text{P}$  NMR spectra at room temperature were recorded on a Bruker Advance III 400 MHz spectrometer.  $^1\text{H}$  chemical shifts were referenced to the residual proton resonance;  $^{31}\text{P}$  chemical shifts were referenced to external 85% aq.  $\text{H}_3\text{PO}_4$ .

## X-ray crystallography

Crystal data of  $\text{Au}_{13}\text{As}_8$  and  $(\text{Ph}_3\text{As})_3\text{AuCl}$  (side product) were collected on a Rigaku Oxford Diffraction XtaLAB Synergy diffractometer using Cu  $K\alpha$  radiation ( $\lambda = 1.54178 \text{ \AA}$ ) at 100 K. A preliminary set of cell constants and an orientation matrix were calculated from reflections harvested from a sampling of reciprocal space. Full data collections were carried out using Cu  $K\alpha$  radiation ( $\lambda = 1.54184 \text{ \AA}$ , PhotonJet-S Cu 50W Microfocus) with exposure time ranging from 0.5 to 2 seconds, frame widths of 1 degree, and a detector distance of approximately 3.2 cm. The intensity data were scaled and corrected for absorption, and final cell constants were calculated from the xyz centroids of strong reflections from the actual data collections after integration. The space groups were determined based on systematic absences and intensity statistics. Absorption correction was applied by using the program CrysAlisPro program.<sup>[1]</sup> The structures were solved using the charge-flipping algorithm, as implemented in the *SUPERFLIP* program<sup>[2]</sup> and refined by full-matrix least-squares techniques against  $F_2$  using the SHELXL program<sup>[3]</sup> through the OLEX2 interface.<sup>[4]</sup> Hydrogen atoms were placed in calculated positions and refined isotropically by using a riding model. Appropriate restraints or constraints were applied to the geometry and the atomic displacement parameters of the atoms in the cluster. The structures were examined using the Addsym subroutine of PLATON<sup>[5]</sup> to ensure that no additional symmetry could be applied to the models. It should be noted that the possible counter anion  $\text{PF}_6^-$  was not located, probably due to its severe disorder. Detailed crystallographic data and refinement parameters are given in Table S1.

## DFT Calculations

DFT optimizations and TD-DFT UV-vis spectrum calculations of the cationic clusters  $[\text{Au}_{13}(\text{AsPh}_3)_8\text{Cl}_4]^+$  (**Au<sub>13</sub>As<sub>8</sub>**) and its stibine analogue  $[\text{Au}_{13}(\text{SbPh}_3)_8\text{Cl}_4]^+$  (**Au<sub>13</sub>Sb<sub>8</sub>**) were performed with the Gaussian 16 suite of programs.<sup>[6]</sup> The gradient-corrected MPW1PW91 exchange correlation functional based on the generalized gradient approximation (GGA) was used;<sup>[7]</sup> the MPW1PW91 functional is expected to be more suitable for the second and third row transition metal systems.<sup>[8]</sup> The Los Alamos valence double- $\zeta$  with Hay–Wadt ECPs (LanL2DZ) basis set containing relativistic effects was employed for Au and Sb atoms,<sup>[9]</sup> and 6-31G(d, p) basis set was used for the remaining atoms.<sup>[10]</sup> Crystal structures of **Au<sub>13</sub>As<sub>8</sub>** and **Au<sub>13</sub>Sb<sub>8</sub>** (obtained from literature<sup>[11]</sup>) were used for geometry optimizations by spin-restricted calculation; the optimized cartesian coordinates of the corresponding structures are appended in Table S7. A total of 600 singlet states were calculated and the root was set as 1 in the TD-DFT UV-vis spectra calculations. Data for orbital composition analysis with Mulliken partition are from Gaussian 16 calculations and further processed with Multiwfn software.<sup>[12]</sup> The most probable transitions were determined based on the oscillator strength values and weights. The optical absorption spectra were convoluted with a Gaussian line shape with a half-width at half-height of 0.25 eV. The optimized structures for **Au<sub>13</sub>As<sub>8</sub>** and **Au<sub>13</sub>Sb<sub>8</sub>** were used for NBO calculations with the NBO 7.0 package embedded in Gaussian 16; the same functional and basis sets were used as those in structural optimization and UV-vis calculations, except that an additional f-type polarization function was added to Au atoms, and an additional d-type polarization function was added to Sb atoms.

## Experimental

**Materials and methods:** Ethanol, dichloromethane (DCM) and hexane were purchased from Sinopharm Chemical Reagent Co., Ltd.  $\text{HAuCl}_4 \cdot 3\text{H}_2\text{O}$ ,  $\text{KPF}_6$ ,  $\text{Me}_2\text{S}$ ,  $\text{NaBH}_4$  and all the pnictine ligands were purchased from Aladdin Industrial Corporation (Shanghai, China).  $\text{Me}_2\text{SAuCl}$  and  $\text{Au}_{13}\text{Sb}_8$  were prepared according to literatures.<sup>[11,13]</sup> All chemicals were used as received without further purification. Details of the physical measurements and instrumentations, X-ray Crystallography, DFT-calculations, catalytic performance of  $\text{Au}_{13}\text{As}_8$  towards  $\text{A}^3$  coupling reaction, and ligand exchange reactions of  $\text{Au}_{13}\text{As}_8$  with phosphines were given in the Supporting Information.

**Synthesis of  $\text{Au}_{13}\text{As}_8$ :**  $\text{Me}_2\text{SAuCl}$  (236 mg, 0.80 mmol) and  $\text{AsPh}_3$  (246 mg, 0.80 mmol) was first mixed in DCM (20 mL), and the solution was stirred at room temperature for 1 h. The solvent was then pumped off to completely remove the  $\text{Me}_2\text{S}$  and the residual was redissolved in DCM (20 mL) and ethanol (8 mL), followed by addition of  $\text{KPF}_6$  (15 mg, 0.08 mmol). Then a freshly prepared solution of  $\text{NaBH}_4$  (15.9 mg, 0.42 mmol) in ethanol (6 mL) was dropwise added within *ca.* 2 mins, accompanied by an immediate color change from colorless to dark-red. After further stirring at room temperature for 16 h, the solution was filtered and the solvents were removed. The residual was redissolved in DCM (20 mL), followed by addition of hexane (80 mL) to precipitate the crude product. After washing with DCM/hexane (8 mL/32 mL) three times, the crude was redissolved in DCM/hexane (12 mL/4 mL). After refiltration, slow evaporation of the solution at 4 °C afforded dark-red plate-like crystals of  $\text{Au}_{13}\text{As}_8$  within two days (yield: 133 mg; 42% based on  $[\text{Au}_{13}(\text{AsPh}_3)_8\text{Cl}_4][\text{PF}_6]$ ).

**Reactions of  $\text{Au}_{13}\text{As}_8$  with  $\text{Ph}_2\text{P}(\text{CH}_2)_2\text{PPh}_2$  (dppe).**  $\text{Au}_{13}\text{As}_8$  (54 mg, 10  $\mu\text{mol}$ ) was dissolved in DCM (15 mL), followed by addition of dppe (20 mg, 50  $\mu\text{mol}$ ). The resulting solution was stirred overnight at room temperature. Hexane (60 mL) was then added and the brown precipitation obtained was redissolved in DCM/ethanol (8 mL/4 mL). After filtration, slow evaporation of the filtrate at room temperature afforded dark-red rod-like crystals of  $[\text{Au}_{13}(\text{dppe})_5\text{Cl}_2]^{3+}$  within three days (yield: 38 mg, 76% based on  $[\text{Au}_{13}(\text{dppe})_5\text{Cl}_2][\text{PF}_6]_3$ ).

**Reactions of Au<sub>13</sub>As<sub>8</sub> with PPh<sub>3</sub>.** Au<sub>13</sub>As<sub>8</sub> (54 mg, 10 μmol) was dissolved in DCM (15 mL), followed by addition of PPh<sub>3</sub> (50 mg, 0.20 mmol). The resulting solution was stirred overnight at room temperature. Hexane (60 mL) was then added and the brown precipitation obtained was redissolved in DCM/ethanol (9 mL/3 mL). After filtration, slow evaporation of the filtrate at room temperature afforded red plate-like crystals of [Au<sub>11</sub>(PPh<sub>3</sub>)<sub>8</sub>Cl<sub>2</sub>]<sup>+</sup> within three days (yield: 18 mg, 41% based on [Au<sub>11</sub>(PPh<sub>3</sub>)<sub>8</sub>Cl][PF<sub>6</sub>]).

**A<sup>3</sup> coupling reaction.** According to literature procedure,<sup>[14]</sup> benzaldehyde (106 mg, 1.0 mmol), piperidine (102 mg, 1.2 mmol) and phenylacetylene (133 mg, 1.3 mmol) were sequentially mixed in a 10 ml of Pyrex tube containing Au<sub>13</sub>As<sub>8</sub> (0.5 mol%) under ambient conditions. The tube was then capped tightly and the dark-red oil mixture was stirred at room temperature for 12 h. Suitable amount of oil crude was directly drawn into an NMR tube for the <sup>1</sup>H NMR experiments. The Au<sub>13</sub>As<sub>8</sub> catalysts can be directly recovered/precipitated out by addition of hexane to the mixture.

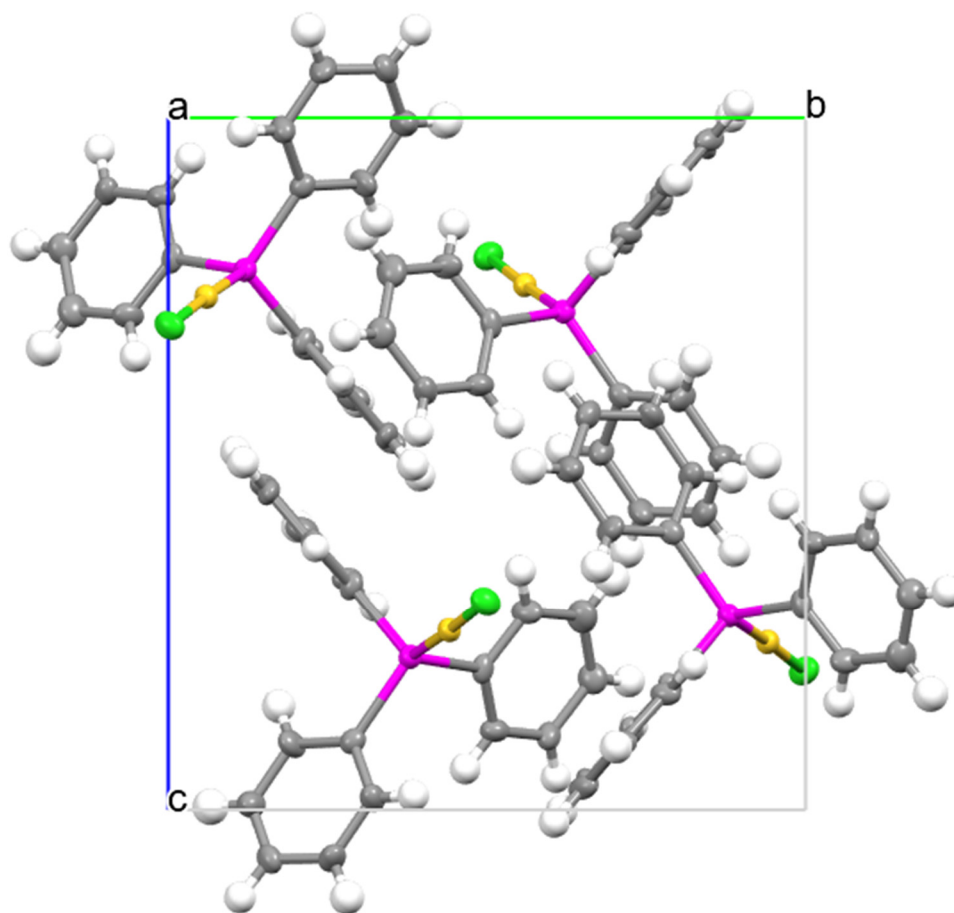

**Figure S1.** Stacking diagram of the precursor complex (Ph<sub>3</sub>As)AuCl in the unit cell.

Note: The same crystal structure was previously reported.<sup>[15]</sup> The aim for the repeated measurement was just to verify its identity, and thus no more analysis on this structure was made. Color code: yellow, Au; magenta, As; green, Cl; grey, C.



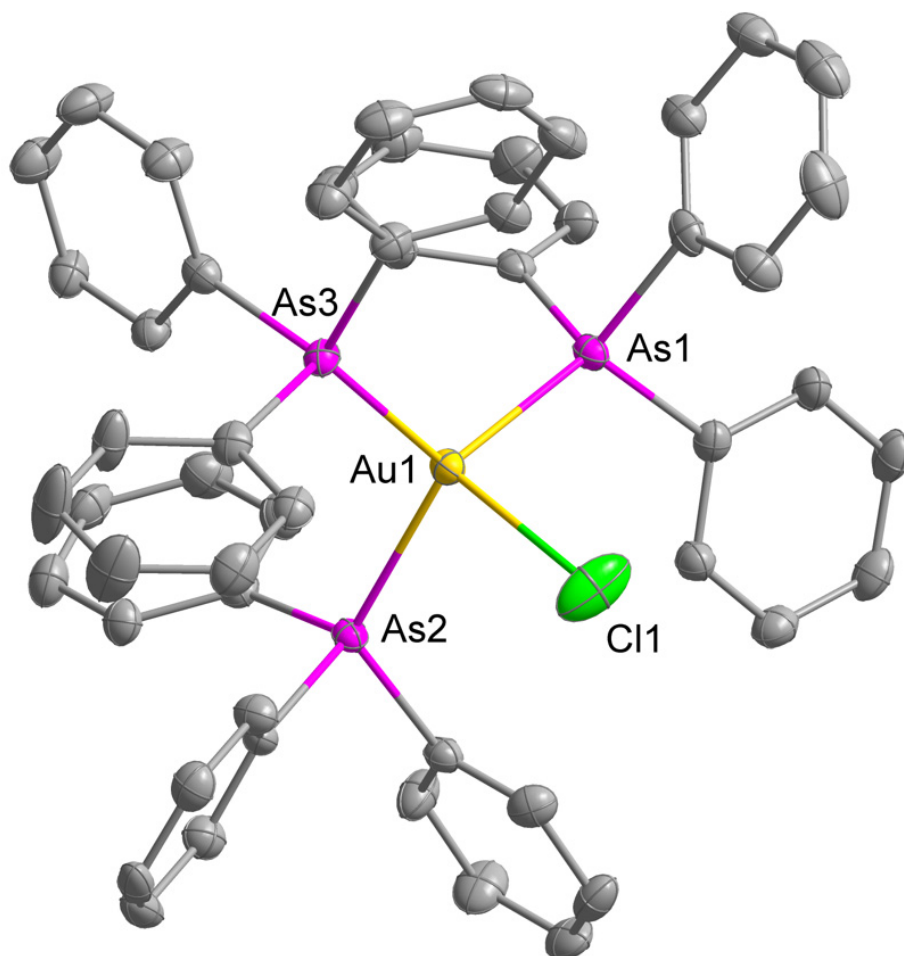

**Figure S2.** Ortep diagram showing the molecular structure of  $(\text{Ph}_3\text{As})_3\text{AuCl}$ .

Note: Thermal ellipsoids are drawn at the 50% probability level. Organic hydrogen atoms are omitted for clarity. Selected bond lengths ( $\text{\AA}$ ) and angles ( $^\circ$ ):  $\text{Au}(1)\text{-As}(1) = 2.4872(4)$ ;  $\text{Au}(1)\text{-As}(2) = 2.5043(4)$ ;  $\text{Au}(1)\text{-As}(3) = 2.4865(3)$ ;  $\text{Au}(1)\text{-Cl}(1) = 2.6394(10)$ ;  $\text{As}(1)\text{-Au}(1)\text{-As}(2) = 117.169(12)$ ;  $\text{As}(1)\text{-Au}(1)\text{-As}(3) = 117.366(12)$ ;  $\text{As}(2)\text{-Au}(1)\text{-As}(3) = 114.995(12)$ ;  $\text{As}(1)\text{-Au}(1)\text{-Cl}(1) = 99.49(3)$ ;  $\text{As}(2)\text{-Au}(1)\text{-Cl}(1) = 98.04(3)$ ;  $\text{As}(3)\text{-Au}(1)\text{-Cl}(1) = 105.15(2)$ . The structure has been deposited with Cambridge Crystallographic Data Centre (deposition number 2244690) and more detailed crystallographic data can be obtained free of charge. Detailed crystallographic data and refinement parameters are given in Table S1.

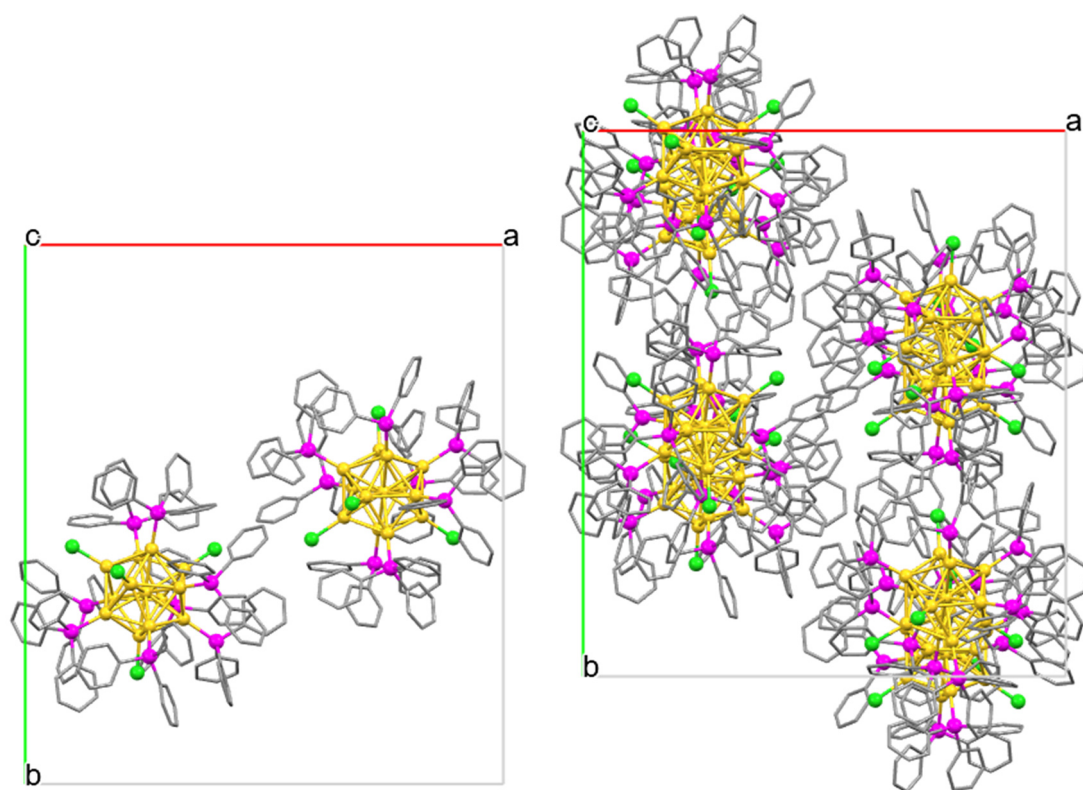

**Figure S3.** The two independent molecules of  $\text{Au}_{13}\text{As}_8$  in the unit cell (left) and their stacking diagram (right).

Note: Detailed crystallographic data and refinement parameters, as well as the selected bond lengths and angles are given in Table S1. Color code: yellow, Au; magenta, As; green, Cl; grey, C. All hydrogen atoms are omitted for clarity.

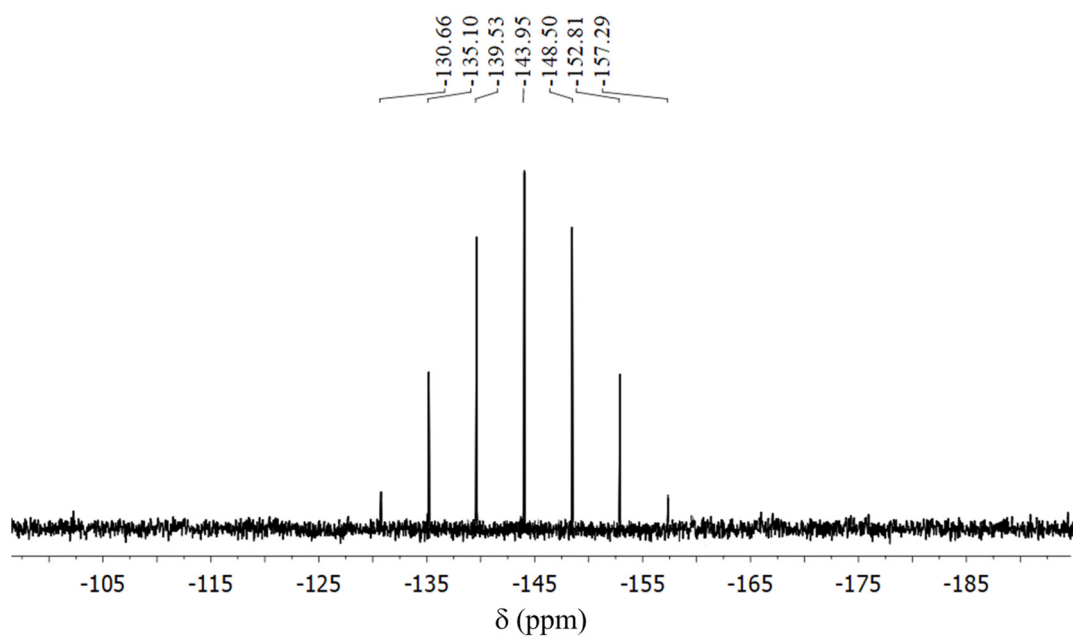

**Figure S4.**  $^{31}\text{P}\{^1\text{H}\}$  NMR of  $\text{Au}_{13}\text{As}_8$  in  $\text{CD}_2\text{Cl}_2$  at room temperature.

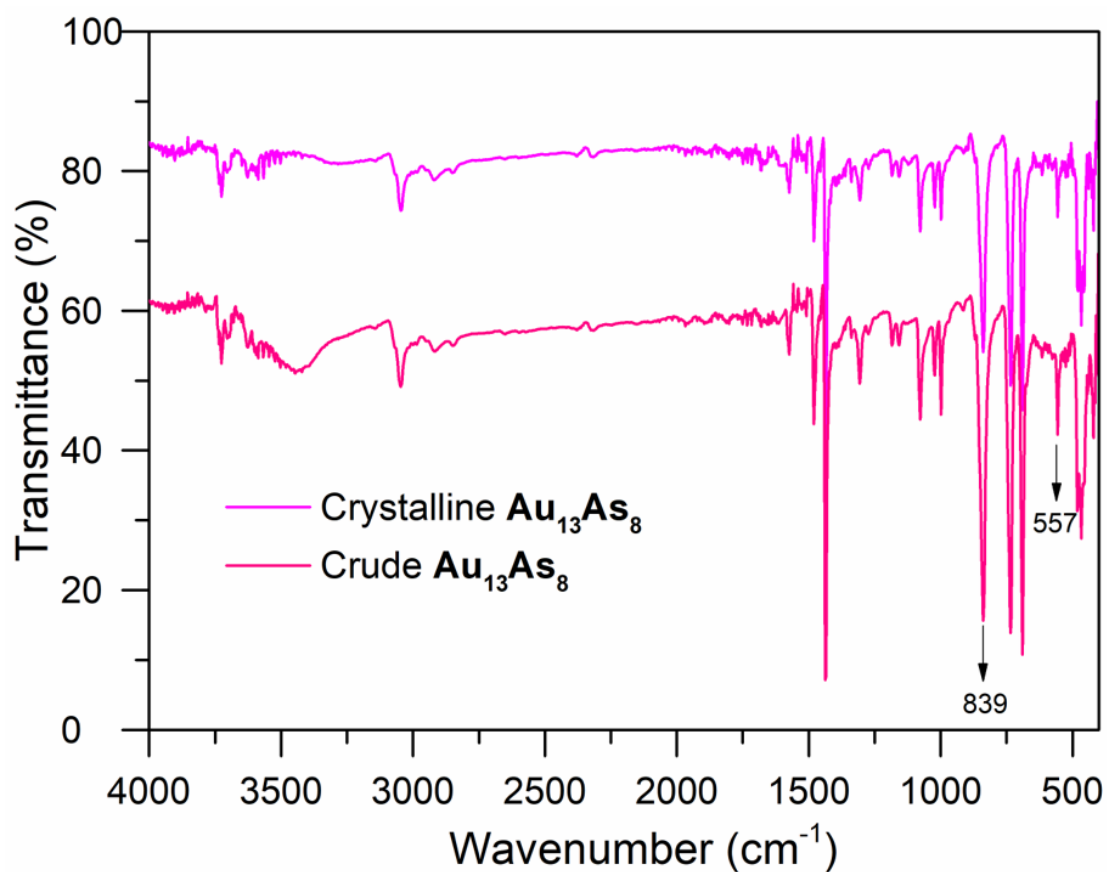

**Figure S5.** Compared IR spectra of crude and crystalline  $\text{Au}_{13}\text{As}_8$ .

Note: The vibrational peaks at 839 and 557  $\text{cm}^{-1}$  are characteristic of  $\text{PF}_6^-$ .

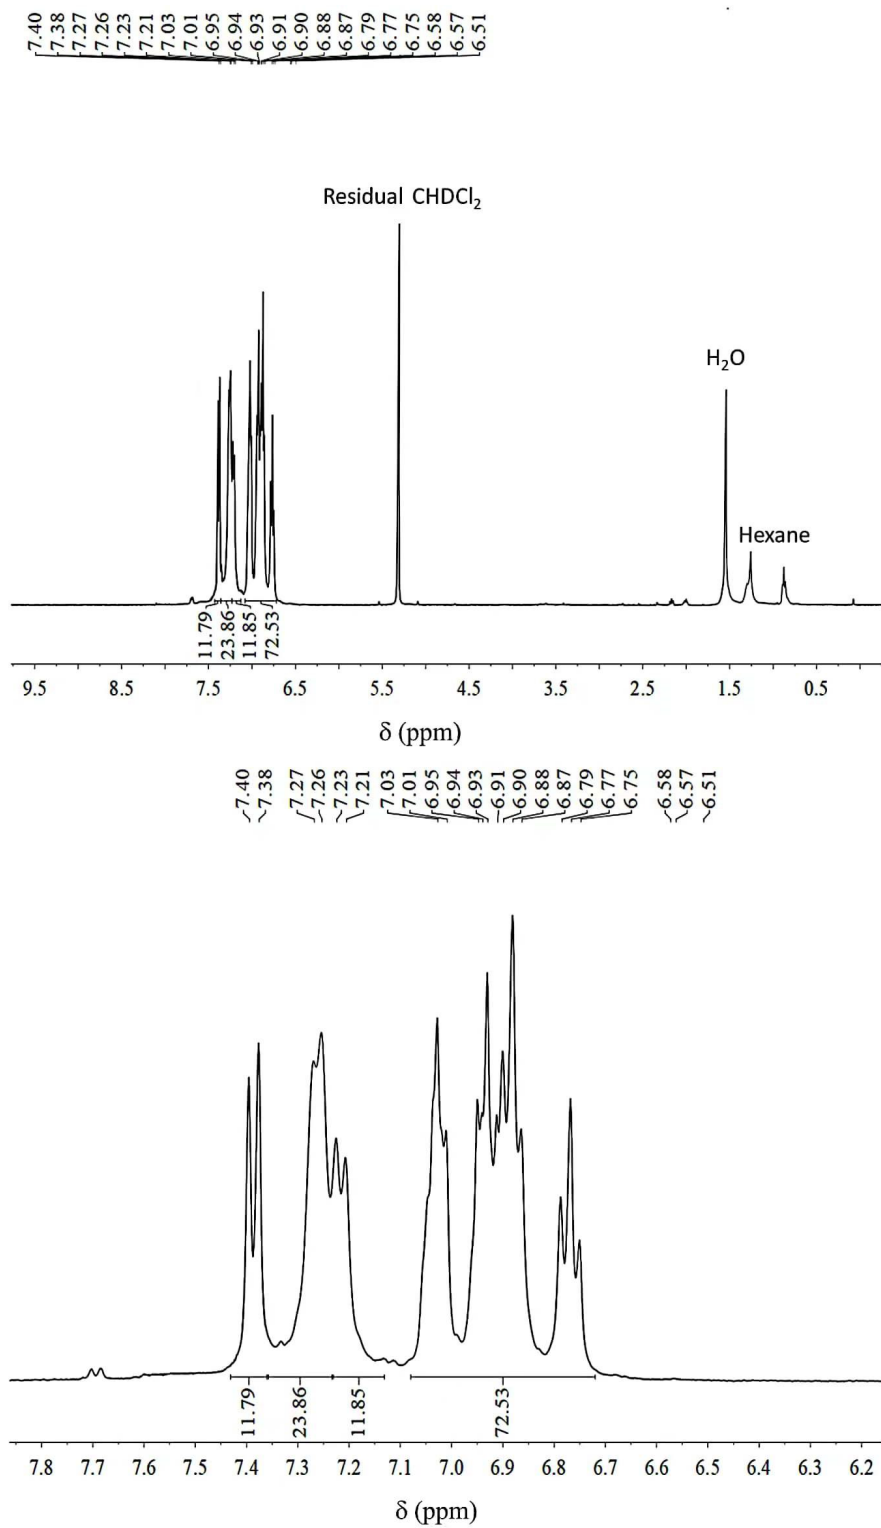

**Figure S6.**  $^1\text{H}$  NMR of  $\text{Au}_{13}\text{As}_8$  in  $\text{CD}_2\text{Cl}_2$  at room temperature in full (top) and aromatic (bottom) regions.

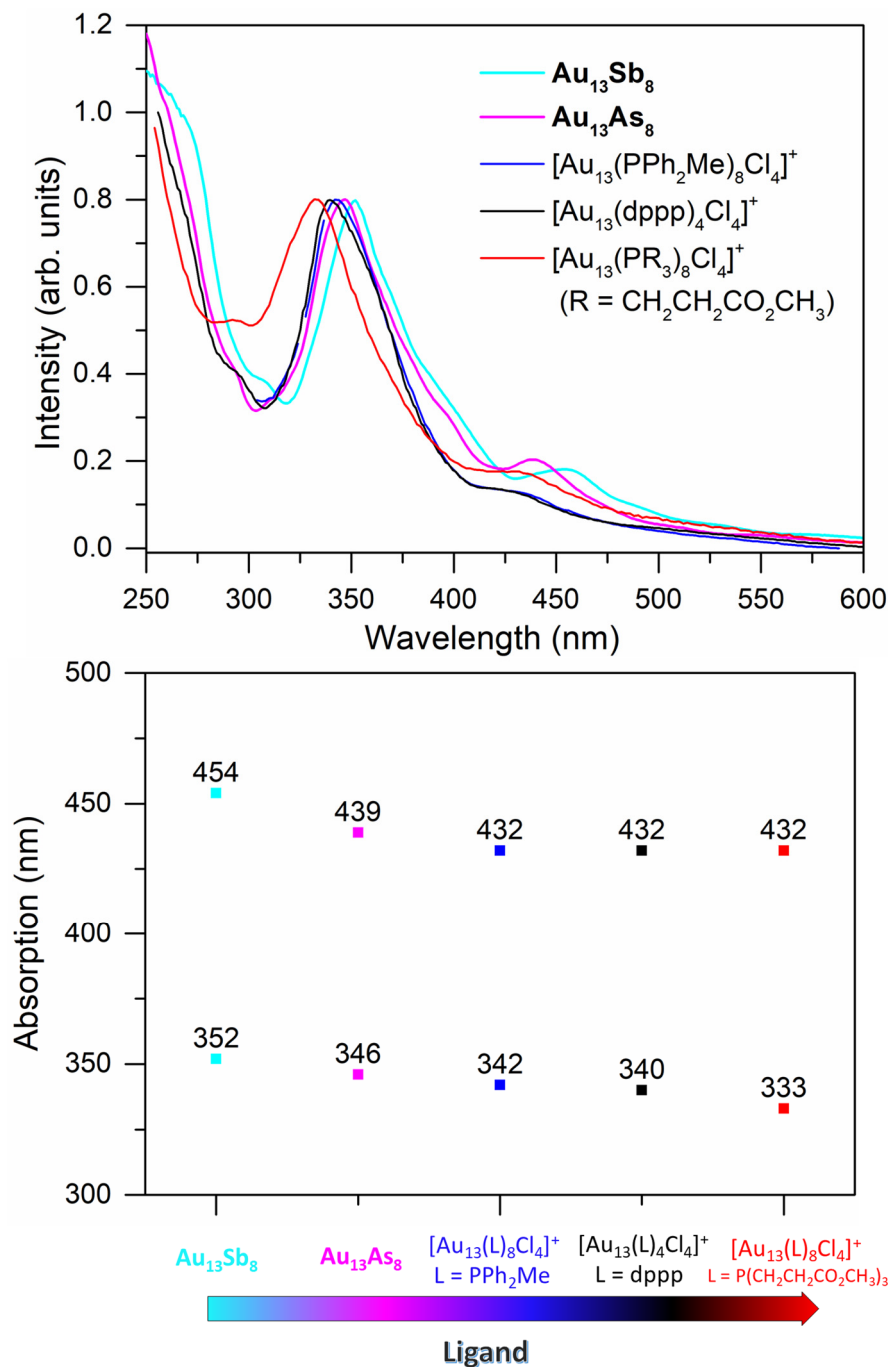

**Figure S7.** Experimental UV-vis spectra of  $\text{Au}_{13}\text{As}_8$ ,  $\text{Au}_{13}\text{Sb}_8$ ,  $[\text{Au}_{13}(\text{PPh}_2\text{Me})_8\text{Cl}_4]^+$ ,  $[\text{Au}_{13}(\text{dppp})_4\text{Cl}_4]^+$  (dppp =  $\text{Ph}_2\text{P}(\text{CH}_2)_3\text{PPh}_2$ ) and  $[\text{Au}_{13}(\text{PR}_3)_8\text{Cl}_4]^+$  ( $\text{R} = \text{CH}_2\text{CH}_2\text{CO}_2\text{CH}_3$ ) (top), and correlations between ligands and absorptions (bottom).

Note: 1) The spectra of the latter three were abstracted from the corresponding literatures.<sup>[16-18]</sup>

2) The spectrum of  $[\text{Au}_{12}(\text{PR}_3)_8\text{Cl}_4]^+$  was recorded in  $\text{CH}_2\text{Cl}_2/\text{CH}_3\text{OH}$  while others were in  $\text{CH}_2\text{Cl}_2$ .

3) The exact structures of  $[\text{Au}_{13}(\text{PPh}_2\text{Me})_8\text{Cl}_4]^+$  and  $[\text{Au}_{13}(\text{dppp})_8\text{Cl}_4]^+$ , or more precisely, their surface ligand arrangements, are unknown because they were only characterized spectroscopically.

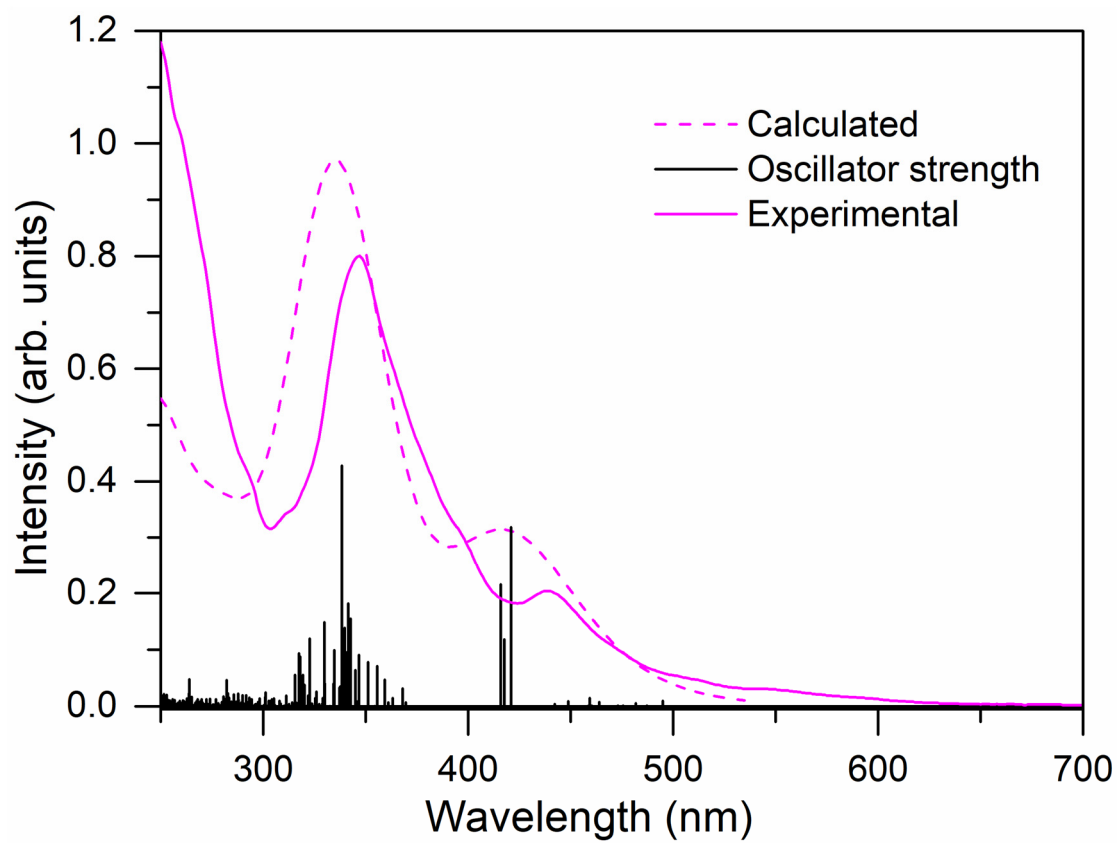

**Figure S8.** Experimental and TD-DFT calculated UV-vis spectra of Au<sub>13</sub>As<sub>8</sub>.

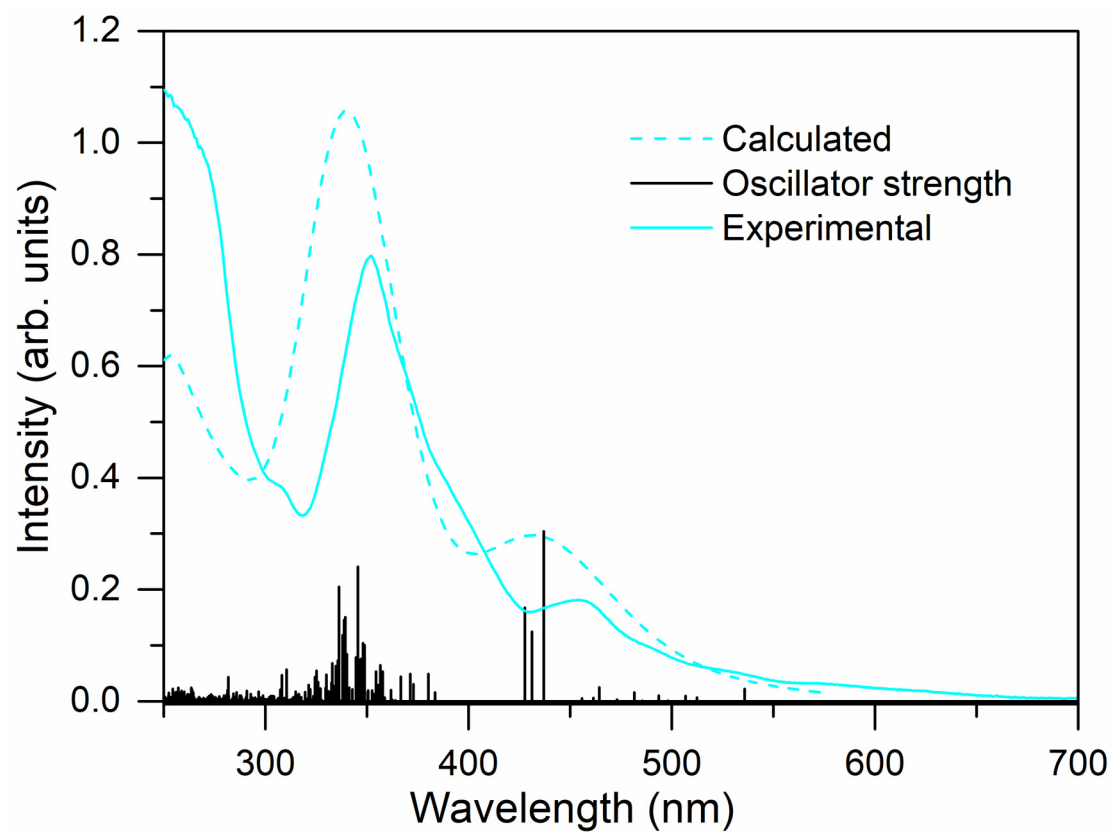

**Figure S9.** Experimental and TD-DFT calculated UV-vis spectra of  $\text{Au}_{13}\text{Sb}_8$ .

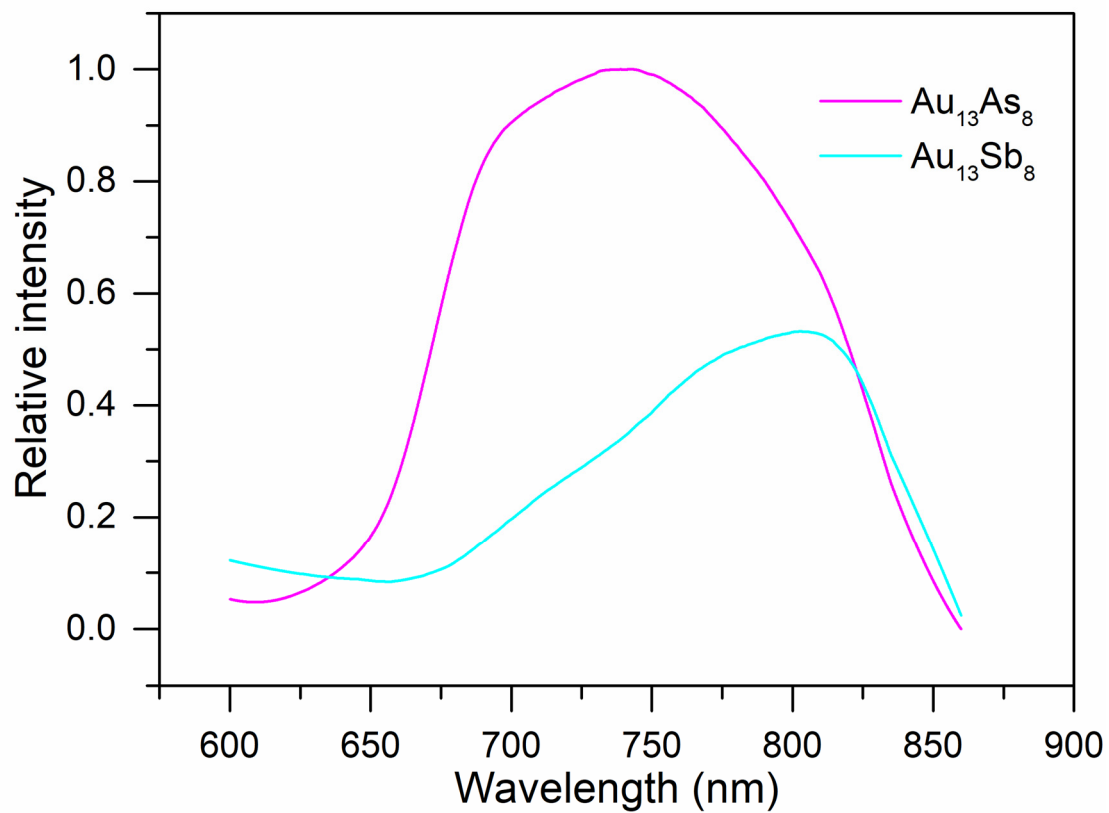

**Figure S10.** Photoluminescence spectra for  $\text{Au}_{13}\text{As}_8$  (magenta line,  $\lambda_{\text{ex}} = 460$  nm) and  $\text{Au}_{13}\text{Sb}_8$  (cyan line,  $\lambda_{\text{ex}} = 470$  nm) in crystalline state at room temperature.



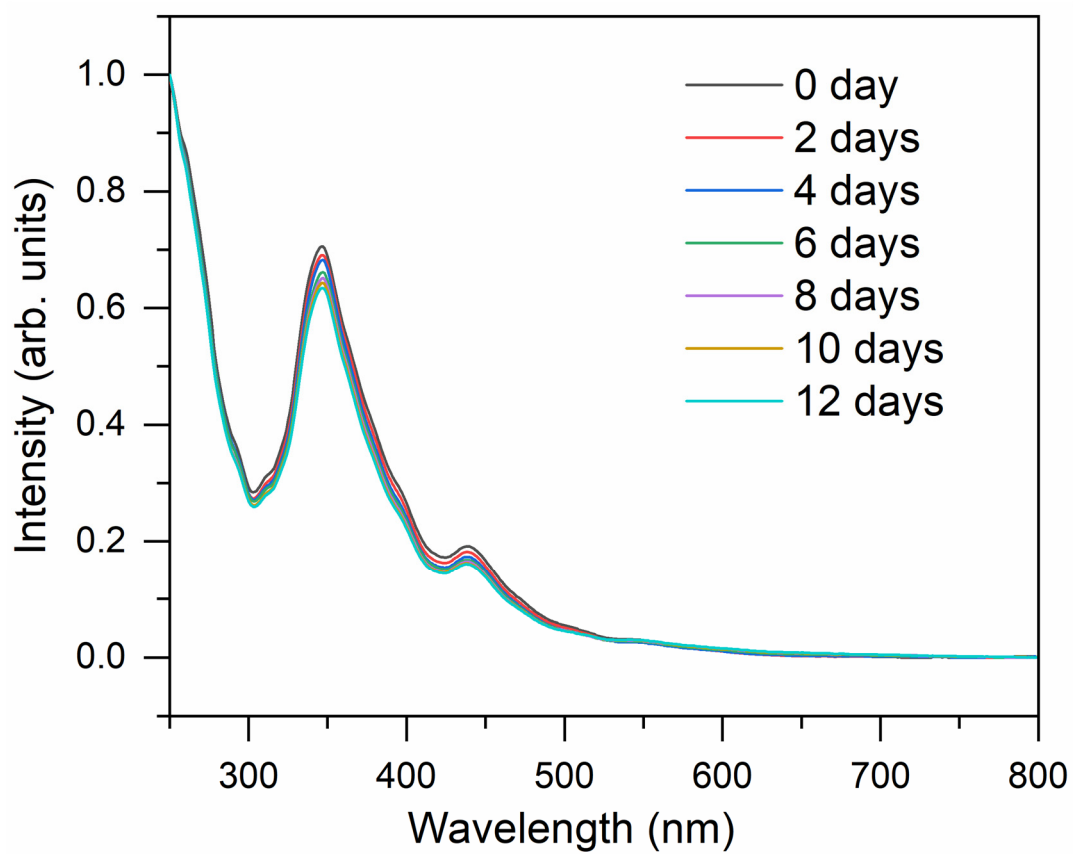

**Figure S11.** Time-course UV-vis spectra of Au<sub>13</sub>As<sub>8</sub> in CH<sub>2</sub>Cl<sub>2</sub> stored at 4 °C.

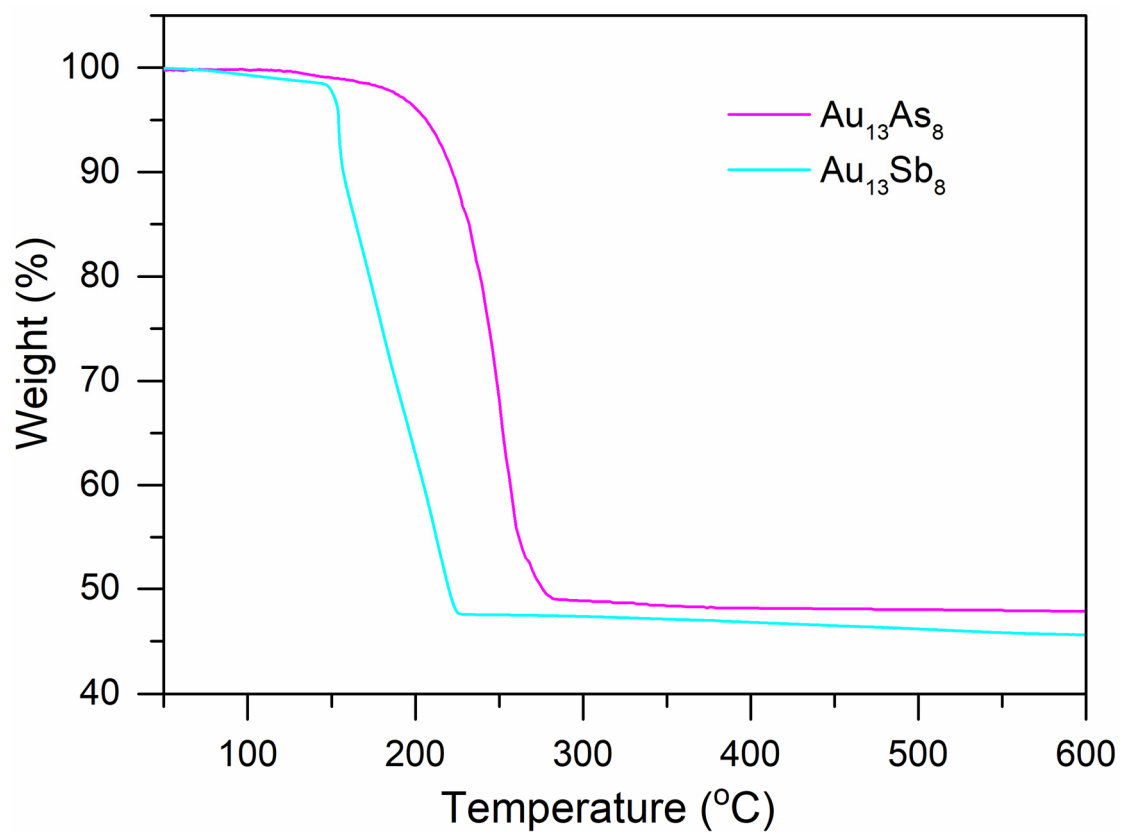

**Figure S12.** Compared TGA curves of **Au<sub>13</sub>As<sub>8</sub>** and **Au<sub>13</sub>Sb<sub>8</sub>**.

Note: The curve for **Au<sub>13</sub>Sb<sub>8</sub>** was abstracted from literature, <sup>[1]</sup> and the curve for **Au<sub>13</sub>As<sub>8</sub>** was acquired under the same conditions (heating rate: 10 °C/min; N<sub>2</sub> flow rate: 60 mL/min). For the **Au<sub>13</sub>As<sub>8</sub>** sample, the weight loss at 600 °C is *ca.* 47.9%, which corresponds to the loss of all ligands and is consistent with the theoretical value of 48.3%.

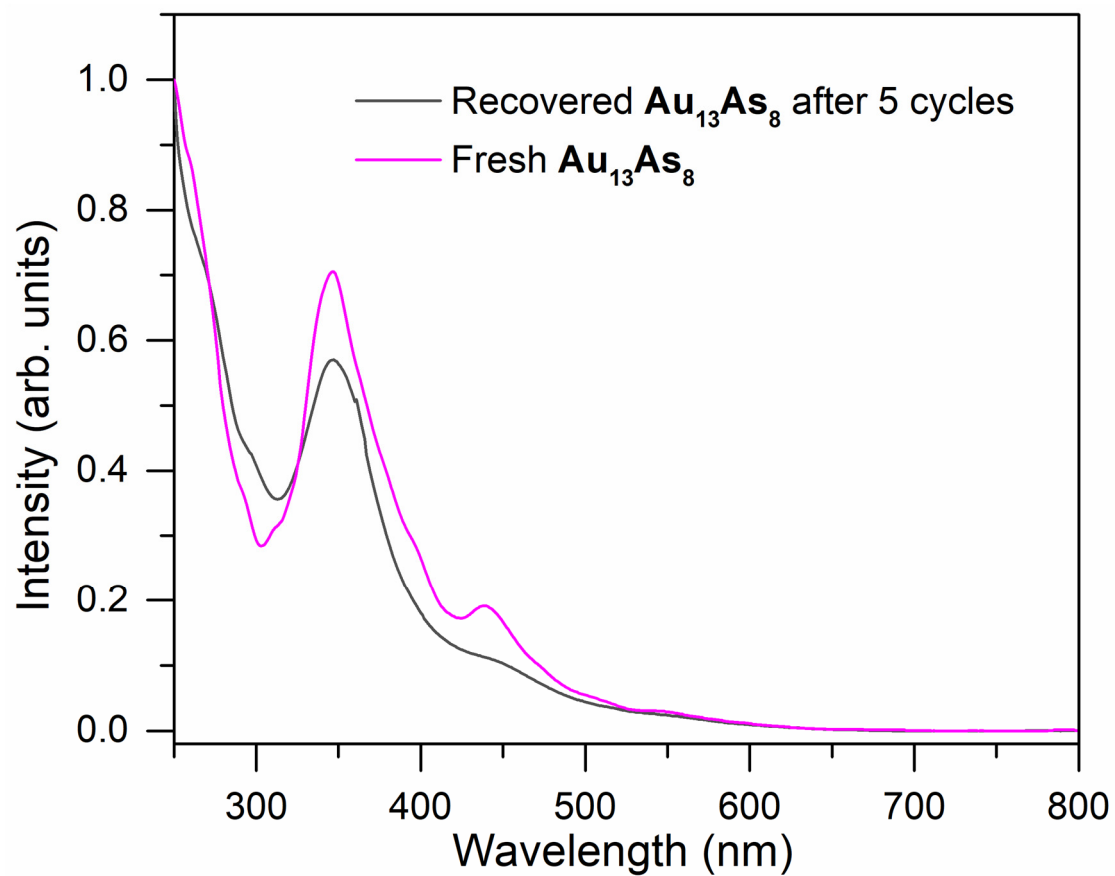

**Figure S13.** Compared UV-vis spectra of the fresh and recovered  $\text{Au}_{13}\text{As}_8$  in DCM after five cycles.

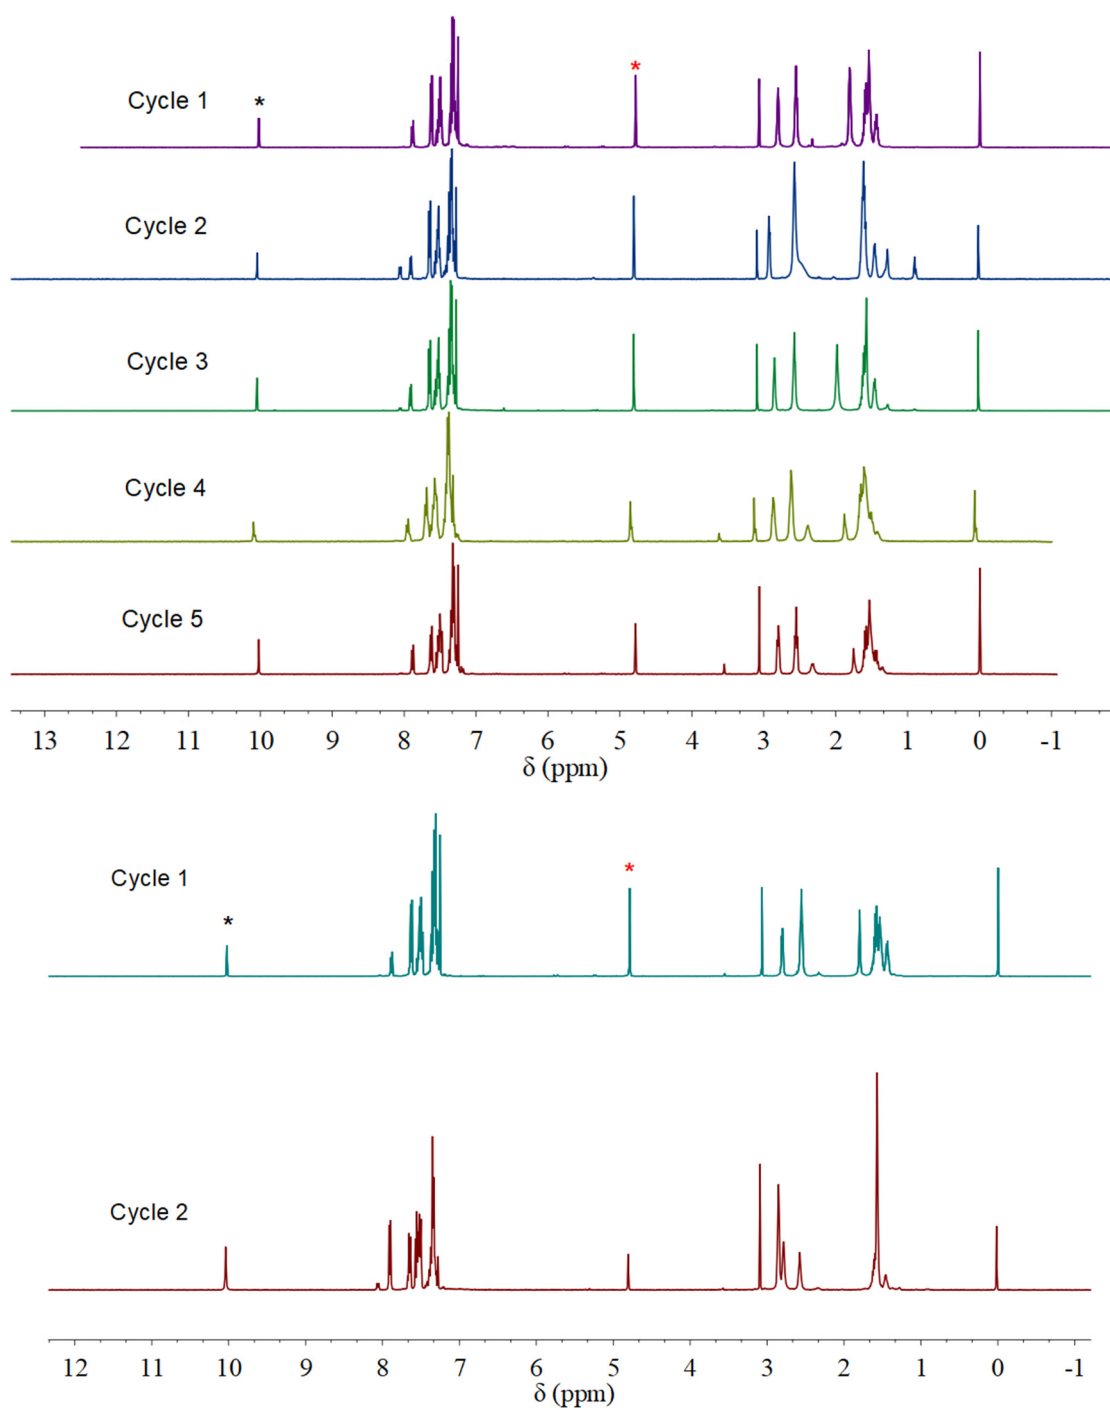

**Figure S14.** <sup>1</sup>H NMR of the crudes in CD<sub>2</sub>Cl<sub>2</sub> for A<sup>3</sup> coupling reactions catalyzed by Au<sub>13</sub>As<sub>8</sub> (top) and Au<sub>13</sub>Sb<sub>8</sub> (bottom).

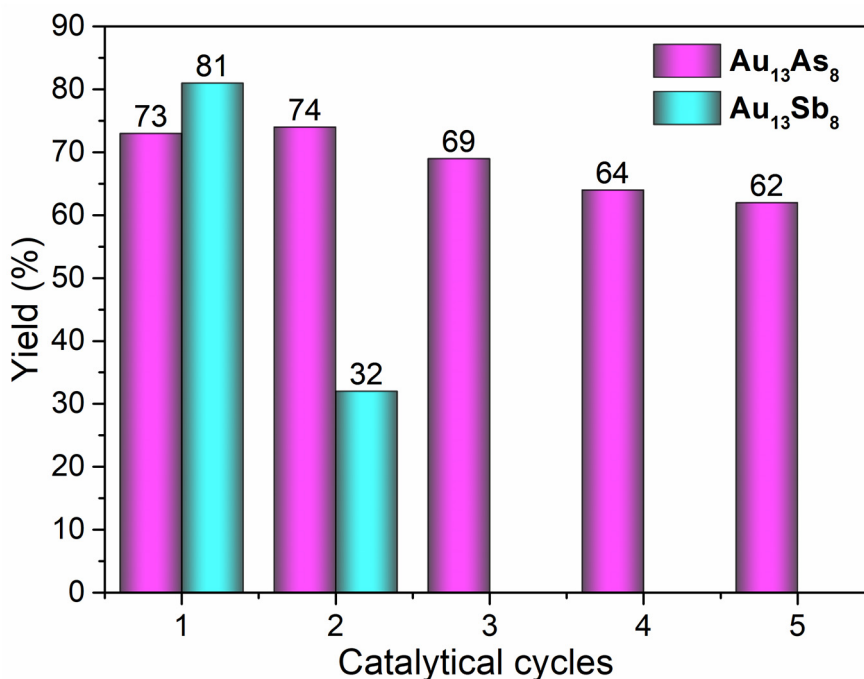

**Figure S15.** The NMR yields of propargylamine for the  $\text{A}^3$  coupling reactions catalyzed by  $\text{Au}_{13}\text{As}_8$  and  $\text{Au}_{13}\text{Sb}_8$ .

Note: 1) **Yield determination:** As shown in Figure S13 and the scheme below, the  $^1\text{H}$  NMR resonances at 10.0 ppm (\*) and 4.81 ppm (\*) are assigned to benzaldehyde ( $\text{HC}=\text{O}$ ) and propargylamine ( $\text{C}-\text{H}$ ), respectively. Their relative integration ratios  $\text{I}(\text{*})/[\text{I}(\text{*})+\text{I}(\text{*})]$  were used to determine the conversion ratio of benzaldehyde. Since there are no other side reactions observed, the conversion ratio of benzaldehyde was also used as the NMR yield of product.

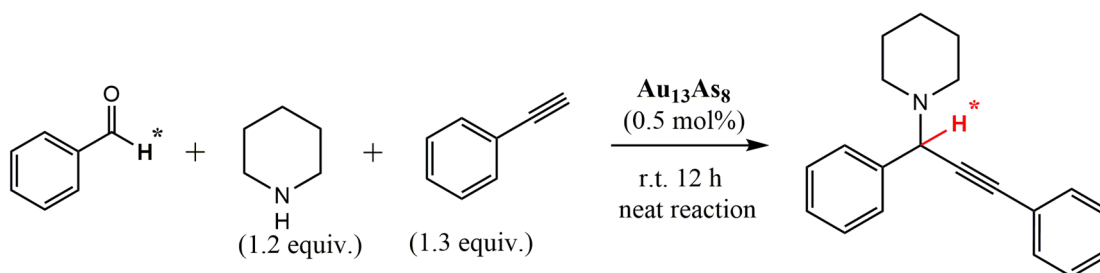

2) **Catalytic performance comparison:** Under similar reaction conditions, the conversion ratio of benzaldehyde with  $\text{Au}_{13}\text{Sb}_8$  as catalyst was determined to be *ca.* 81% in the first cycle, similar to the value (78%) reported in previous literature.<sup>[14]</sup> Given the obvious decomposition observed in each cycle for  $\text{Au}_{13}\text{Sb}_8$ , no further trial was made after the second cycle due to the marked decrease in yield.

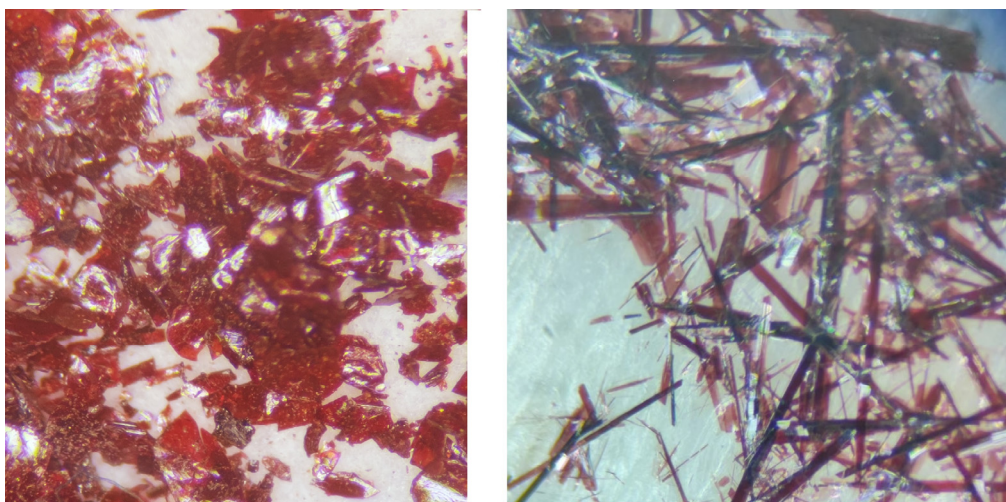

**Figure S16.** Photographs of the crystals of  $[\text{Au}_{11}(\text{PPh}_3)_8\text{Cl}_2]^+$  (left) and  $[\text{Au}_{13}(\text{dppe})_5\text{Cl}_2]^{3+}$  (right).

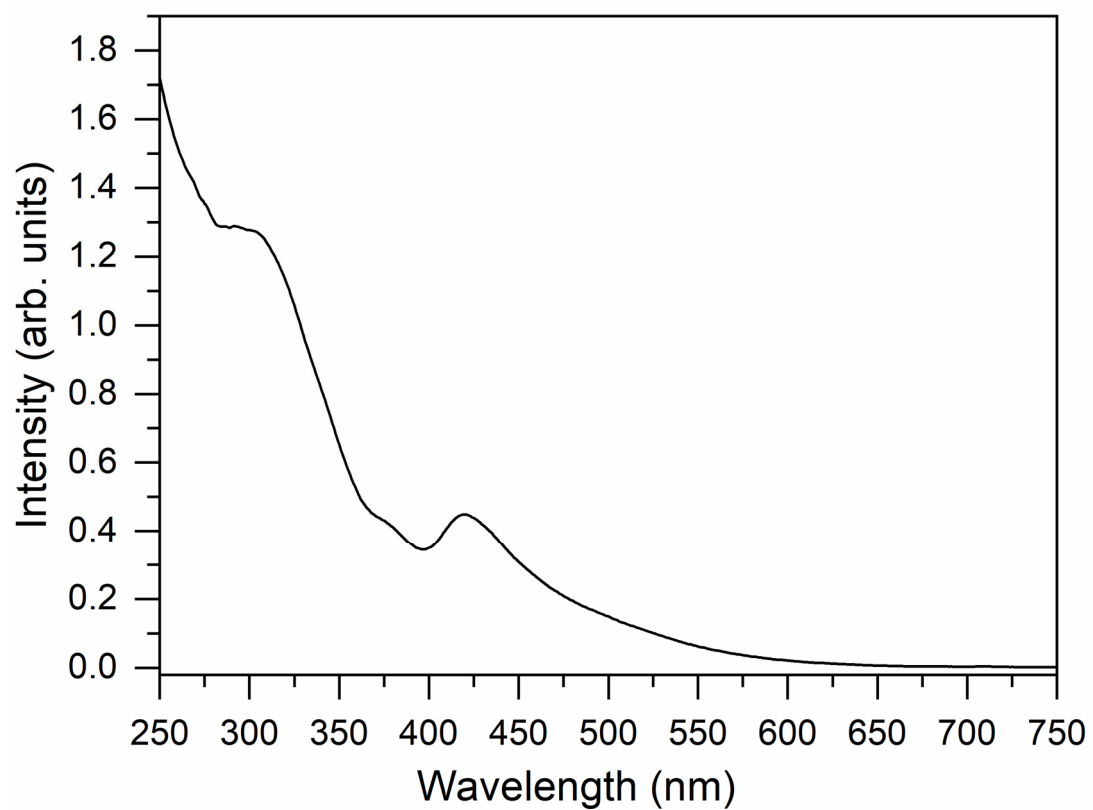

**Figure S17.** UV-vis spectrum of  $[\text{Au}_{11}(\text{PPh}_3)_8\text{Cl}_2]^+$  in  $\text{CH}_2\text{Cl}_2$ .

Note: The pattern and peak values are consistent with those from literature.<sup>[19]</sup>

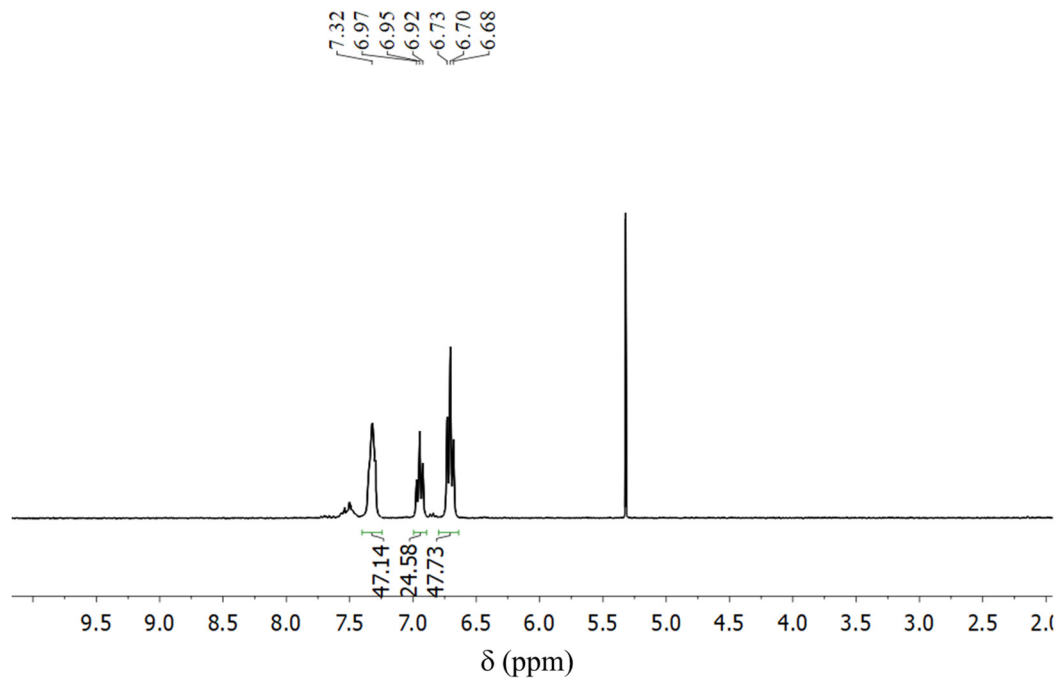

**Figure S18.**  ${}^1\text{H}\{{}^{31}\text{P}\}$  NMR of  $[\text{Au}_{11}(\text{PPh}_3)_8\text{Cl}_2]^+$  in  $\text{CD}_2\text{Cl}_2$ .

Note: The pattern and peak values are consistent with those from literature.<sup>[19]</sup>



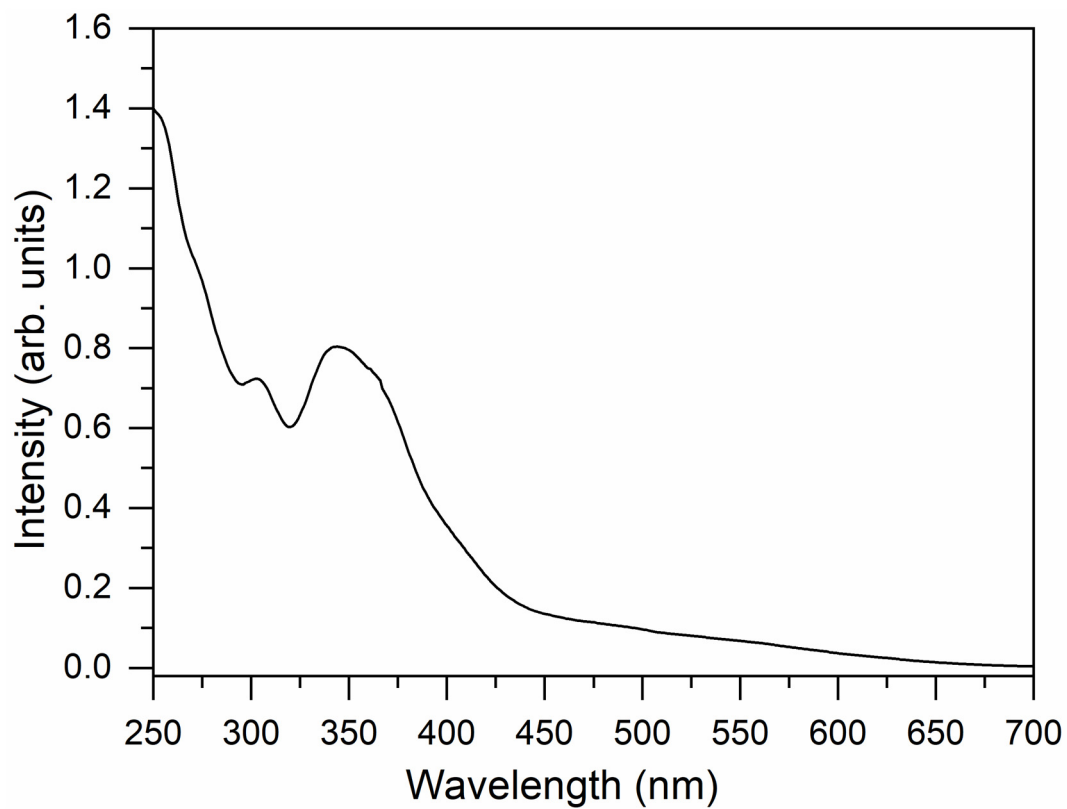

**Figure S19.** UV-vis spectrum of  $[Au_{13}(dppe)_5Cl_2]^{3+}$  in  $CH_2Cl_2$ .

Note: The pattern and peak values are consistent with those from literature.<sup>[17]</sup>

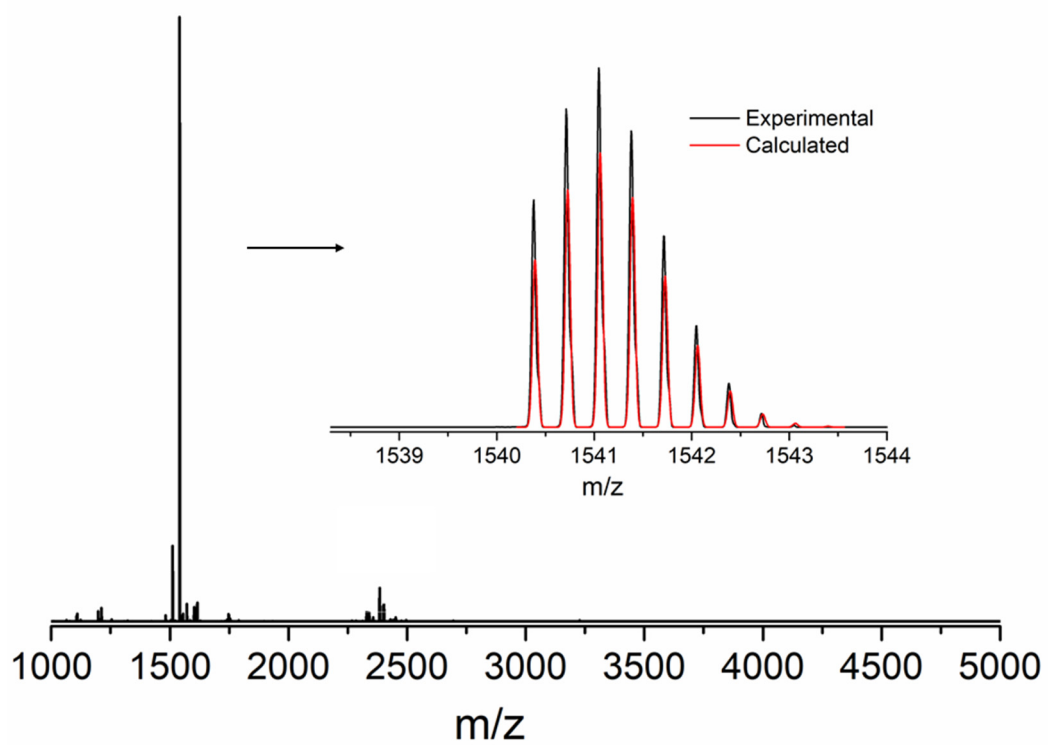

**Figure S20.** ESI-MS(+) spectrum of  $[\text{Au}_{13}(\text{dppe})_5\text{Cl}_2]^{3+}$  in  $\text{CH}_2\text{Cl}_2$ . Inset: the experimental (black trace) and calculated (red trace) isotopic patterns of the molecular ion  $[\text{Au}_{13}(\text{dppe})_5\text{Cl}_2]^{3+}$ .

**Table S1.** Crystallographic Data for **Au<sub>13</sub>As<sub>8</sub>** and **(Ph<sub>3</sub>As)<sub>3</sub>AuCl**.

| Compound                                    | <b>Au<sub>13</sub>As<sub>8</sub></b>                                               | <b>(Ph<sub>3</sub>As)<sub>3</sub>AuCl</b>            |
|---------------------------------------------|------------------------------------------------------------------------------------|------------------------------------------------------|
| Empirical formula                           | C <sub>144</sub> H <sub>120</sub> As <sub>8</sub> Au <sub>13</sub> Cl <sub>4</sub> | C <sub>54</sub> H <sub>45</sub> As <sub>3</sub> AuCl |
| Formula weight                              | 5152.12                                                                            | 1151.07                                              |
| Temperature/K                               | 100(2)                                                                             | 100(2)                                               |
| Crystal system                              | Monoclinic                                                                         | Triclinic                                            |
| Space group                                 | P2 <sub>1</sub> /n                                                                 | P-1                                                  |
| a/Å                                         | 28.1786(2)                                                                         | 13.2861(4)                                           |
| b/Å                                         | 31.8205(4)                                                                         | 13.9323(4)                                           |
| c/Å                                         | 36.1804(5)                                                                         | 14.0077(4)                                           |
| α/°                                         | 90                                                                                 | 83.702(2)                                            |
| β/°                                         | 91.8449(10)                                                                        | 75.517(3)                                            |
| γ/°                                         | 90                                                                                 | 86.706(2)                                            |
| Volume/Å <sup>3</sup>                       | 32424.6(6)                                                                         | 2494.16(13)                                          |
| Z                                           | 8                                                                                  | 2                                                    |
| ρ <sub>calc</sub> g/cm <sup>3</sup>         | 2.111                                                                              | 1.533                                                |
| Theta range for data collection             | 2.811 to 67.079°                                                                   | 3.275 to 67.075°                                     |
| Absorption coefficient                      | 24.229                                                                             | 8.491                                                |
| F(000)                                      | 18744                                                                              | 1128                                                 |
| Radiation                                   | Cu Kα (λ = 1.54184)                                                                | Cu Kα (λ = 1.54184)                                  |
| Reflections collected                       | 195960                                                                             | 25646                                                |
| Independent reflections                     | 57368 [R <sub>int</sub> = 0.0919]                                                  | 8779 [R <sub>int</sub> = 0.0431]                     |
| Max. and min. transmission                  | 1.00000 and 0.39067                                                                | 1.00000 and 0.82453                                  |
| Data/parameters                             | 57368/2467                                                                         | 8779/532                                             |
| Goodness-of-fit on F <sup>2</sup>           | 1.077                                                                              | 1.055                                                |
| Final R indexes [I > 2σ (I)]                | R1 = 0.1337<br>wR2 = 0.3421                                                        | R1 = 0.0267<br>wR2 = 0.0650                          |
| Final R indexes [all data]                  | R1 = 0.1543<br>wR2 = 0.3562                                                        | R1 = 0.0288<br>wR2 = 0.0660                          |
| Largest diff. peak/hole / e Å <sup>-3</sup> | 5.060/-4.674                                                                       | 0.922/-1.012                                         |

**Table S2.** Selected bond distances (Å) for crystallographic  $\text{Au}_{13}\text{As}_8$  and  $\text{Au}_{13}\text{Sb}_8$ .

| $\text{Au}_{13}\text{As}_8$   |                        |                        |                        | $\text{Au}_{13}\text{Sb}_8$ |                        |
|-------------------------------|------------------------|------------------------|------------------------|-----------------------------|------------------------|
| Independent molecule 1        |                        | Independent molecule 2 |                        |                             |                        |
|                               |                        |                        |                        |                             |                        |
| <b>Radial Au-Au bonds</b>     |                        |                        |                        |                             |                        |
| Bonded to As                  |                        |                        | Bonded to Sb           |                             |                        |
| Au1-Au3                       | 2.759(2)               | Au14-Au15              | 2.770(2)               | Au13-Au1                    | 2.794(2)               |
| Au1-Au4                       | 2.754(2)               | Au14-Au17              | 2.757(2)               | Au13-Au2                    | 2.727(1)               |
| Au1-Au7                       | 2.807(2)               | Au14-Au19              | 2.789(2)               | Au13-Au3                    | 2.737(1)               |
| Au1-Au8                       | 2.762(2)               | Au14-Au20              | 2.745(2)               | Au13-Au4                    | 2.759(1)               |
| Au1-Au9                       | 2.810(2)               | Au14-Au21              | 2.758(2)               | Au13-Au5                    | 2.715(1)               |
| Au1-Au10                      | 2.750(2)               | Au14-Au23              | 2.766(2)               | Au13-Au6                    | 2.769(1)               |
| Au1-Au11                      | 2.760(2)               | Au14-Au25              | 2.779(2)               | Au13-Au7                    | 2.722(1)               |
| Au1-Au12                      | 2.739(2)               | Au14-Au26              | 2.758(2)               | Au13-Au8                    | 2.727(1)               |
| <i>Sub-Average</i>            | <i>2.766(2)</i>        | <i>Sub-Average</i>     | <i>2.765(2)</i>        | <i>Sub-Average</i>          | <i>2.744(2)</i>        |
| Bonded to Cl                  |                        |                        | Bonded to Cl           |                             |                        |
| Au1-Au2                       | 2.726(2)               | Au14-Au16              | 2.737(2)               | Au13-Au9                    | 2.756(1)               |
| Au1-Au5                       | 2.750(2)               | Au14-Au18              | 2.736(2)               | Au13-Au10                   | 2.763(1)               |
| Au1-Au6                       | 2.739(2)               | Au14-Au22              | 2.734(2)               | Au13-Au11                   | 2.735(1)               |
| Au1-Au13                      | 2.730(2)               | Au14-Au24              | 2.757(2)               | Au13-Au12                   | 2.766(1)               |
| <i>Sub-Average</i>            | <i>2.736(2)</i>        | <i>Sub-Average</i>     | <i>2.741(2)</i>        | <i>Sub-Average</i>          | <i>2.755(2)</i>        |
| <b><i>Average</i></b>         | <b><i>2.757(2)</i></b> | <b><i>Average</i></b>  | <b><i>2.757(2)</i></b> | <b><i>Average</i></b>       | <b><i>2.748(1)</i></b> |
| <b>Peripheral Au-Au bonds</b> |                        |                        |                        |                             |                        |
| Au2-Au3                       | 2.886(2)               | Au15-Au16              | 2.905(3)               | Au1-Au6                     | 2.910(1)               |
| Au2-Au4                       | 2.861(2)               | Au15-Au17              | 2.903(2)               | Au1-Au7                     | 2.862(1)               |
| Au2-Au7                       | 2.898(2)               | Au15-Au18              | 2.838(2)               | Au1-Au11                    | 2.908(2)               |
| Au2-Au8                       | 2.878(2)               | Au15-Au19              | 2.918(2)               | Au2-Au9                     | 2.868(1)               |
| Au2-Au12                      | 2.939(2)               | Au15-Au20              | 2.956(2)               | Au2-Au10                    | 2.910(1)               |
| Au3-Au4                       | 2.961(3)               | Au16-Au17              | 2.905(2)               | Au2-Au3                     | 2.893(1)               |
| Au3-Au5                       | 2.923(2)               | Au16-Au20              | 2.846(2)               | Au2-Au1                     | 2.917(1)               |
| Au3-Au6                       | 2.812(2)               | Au16-Au21              | 2.962(2)               | Au2-Au11                    | 2.840(1)               |
| Au3-Au7                       | 2.906(2)               | Au16-Au25              | 2.890(2)               | Au3-Au8                     | 2.869(1)               |
| Au4-Au5                       | 2.830(2)               | Au17-Au18              | 2.910(2)               | Au3-Au9                     | 2.925(1)               |
| Au4-Au8                       | 2.909(2)               | Au17-Au24              | 2.824(2)               | Au3-Au10                    | 2.849(1)               |
| Au4-Au9                       | 2.907(2)               | Au17-Au25              | 2.935(3)               | Au3-Au4                     | 2.886(1)               |
| Au5-Au6                       | 2.905(2)               | Au18-Au19              | 2.968(2)               | Au4-Au5                     | 2.877(1)               |
| Au5-Au9                       | 2.955(2)               | Au18-Au23              | 2.808(2)               | Au4-Au12                    | 2.886(1)               |
| Au5-Au10                      | 2.831(2)               | Au18-Au24              | 2.901(2)               | Au5-Au6                     | 2.876(2)               |
| Au6-Au7                       | 2.985(2)               | Au19-Au20              | 2.842(2)               | Au5-Au11                    | 2.896(2)               |
| Au6-Au10                      | 2.909(2)               | Au19-Au22              | 2.890(2)               | Au5-Au12                    | 2.884(1)               |
| Au6-Au11                      | 2.836(2)               | Au19-Au23              | 2.932(2)               | Au6-Au7                     | 2.906(1)               |
| Au7-Au11                      | 2.916(2)               | Au20-Au21              | 2.889(2)               | Au6-Au11                    | 2.855(1)               |
| Au7-Au12                      | 2.870(2)               | Au20-Au22              | 2.963(2)               | Au6-Au12                    | 2.895(1)               |
| Au8-Au9                       | 2.861(2)               | Au21-Au22              | 2.851(2)               | Au7-Au12                    | 2.855(2)               |

|                             |                 |                |                 |                |                 |
|-----------------------------|-----------------|----------------|-----------------|----------------|-----------------|
| Au8-Au12                    | 2.904(2)        | Au21-Au25      | 2.872(2)        | Au8-Au9        | 2.864(1)        |
| Au8-Au13                    | 2.934(2)        | Au21-Au26      | 2.940(2)        | Au8-Au4        | 2.845(1)        |
| Au9-Au10                    | 2.908(2)        | Au22-Au23      | 2.882(2)        | Au8-Au7        | 2.898(1)        |
| Au9-Au13                    | 2.909(2)        | Au22-Au26      | 2.887(2)        | Au8-Au12       | 2.953(1)        |
| Au10-Au11                   | 2.955(2)        | Au23-Au24      | 2.955(2)        | Au9-Au1        | 2.916(1)        |
| Au10-Au13                   | 2.901(2)        | Au23-Au26      | 2.940(2)        | Au9-Au7        | 2.919(1)        |
| Au11-Au12                   | 2.942(2)        | Au24-Au25      | 2.947(2)        | Au10-Au4       | 2.957(1)        |
| Au11-Au13                   | 2.910(2)        | Au24-Au26      | 2.841(2)        | Au10-Au5       | 2.850(1)        |
| Au12-Au13                   | 2.850(2)        | Au25-Au26      | 2.898(2)        | Au10-Au11      | 2.905(1)        |
| <b>Average</b>              | <b>2.900(2)</b> | <b>Average</b> | <b>2.900(2)</b> | <b>Average</b> | <b>2.889(1)</b> |
| <b>Au-As or Au-Sb bonds</b> |                 |                |                 |                |                 |
| Au10-As1                    | 2.397(4)        | Au17-As9       | 2.398(4)        | Au1-Sb1        | 2.539(2)        |
| Au9-As2                     | 2.414(4)        | Au15-As10      | 2.412(5)        | Au2-Sb2        | 2.524(2)        |
| Au3-As3                     | 2.396(4)        | Au19-As11      | 2.417(4)        | Au3-Sb3        | 2.522(2)        |
| Au7-As4                     | 2.414(6)        | Au23-As12      | 2.390(4)        | Au4-Sb4        | 2.547(2)        |
| Au12-As5                    | 2.400(4)        | Au26-As13      | 2.407(4)        | Au5-Sb5        | 2.518(2)        |
| Au8-As6                     | 2.399(5)        | Au21-As14      | 2.402(4)        | Au6-Sb6        | 2.532(2)        |
| Au4-As7                     | 2.392(4)        | Au25-As15      | 2.408(5)        | Au7-Sb7        | 2.521(2)        |
| Au11-As8                    | 2.407(4)        | Au20-As16      | 2.388(4)        | Au8-Sb8        | 2.523(2)        |
| <b>Average</b>              | <b>2.402(4)</b> | <b>Average</b> | <b>2.403(4)</b> | <b>Average</b> | <b>2.528(2)</b> |
| <b>Au-Cl bonds</b>          |                 |                |                 |                |                 |
| Au2-Cl1                     | 2.37(1)         | Au16-Cl5       | 2.32(1)         | Au9-Cl1        | 2.350(5)        |
| Au5-Cl2                     | 2.31(1)         | Au18-Cl6       | 2.32(2)         | Au10-Cl2       | 2.327(7)        |
| Au6-Cl3                     | 2.331(9)        | Au24-Cl7       | 2.350(9)        | Au11-Cl3       | 2.298(6)        |
| Au13-Cl4                    | 2.333(9)        | Au22-Cl8       | 2.332(9)        | Au12-Cl4       | 2.353(5)        |
| <b>Average</b>              | <b>2.34(1)</b>  | <b>Average</b> | <b>2.33(1)</b>  | <b>Average</b> | <b>2.332(6)</b> |

Note: The comparison data for **Au<sub>13</sub>Sb<sub>8</sub>** was abstracted from literature.<sup>[11]</sup>

**Table S3.** Selected bond distances (Å) for structurally optimized **Au<sub>13</sub>As<sub>8</sub>** and **Au<sub>13</sub>Sb<sub>8</sub>**.

| <b>Au<sub>13</sub>As<sub>8</sub></b> |                    |                |                | <b>Au<sub>13</sub>Sb<sub>8</sub></b> |                |  |  |
|--------------------------------------|--------------------|----------------|----------------|--------------------------------------|----------------|--|--|
|                                      |                    |                |                |                                      |                |  |  |
| <b>Radial Au-Au bonds</b>            |                    |                |                |                                      |                |  |  |
| Bonded to As                         | Au1-Au2            | 2.85716        | Bonded to Sb   | Au6-Au1                              | 2.82279        |  |  |
|                                      | Au1-Au3            | 2.86254        |                | Au6-Au2                              | 2.82895        |  |  |
|                                      | Au1-Au4            | 2.88361        |                | Au6-Au3                              | 2.81448        |  |  |
|                                      | Au1-Au5            | 2.82639        |                | Au6-Au13                             | 2.85363        |  |  |
|                                      | Au1-Au7            | 2.82639        |                | Au6-Au14                             | 2.85194        |  |  |
|                                      | Au1-Au8            | 2.88360        |                | Au6-Au15                             | 2.82930        |  |  |
|                                      | Au1-Au9            | 2.85716        |                | Au6-Au16                             | 2.84249        |  |  |
|                                      | Au1-Au12           | 2.86253        |                | Au6-Au17                             | 2.80417        |  |  |
|                                      | <i>Sub-Average</i> | <i>2.85742</i> |                | <i>Sub-Average</i>                   | <i>2.83097</i> |  |  |
| Bonded to Cl                         | Au1-Au6            | 2.78475        | Bonded to Cl   | Au6-Au4                              | 2.77441        |  |  |
|                                      | Au1-Au10           | 2.81380        |                | Au6-Au5                              | 2.79928        |  |  |
|                                      | Au1-Au11           | 2.81380        |                | Au6-Au18                             | 2.80029        |  |  |
|                                      | Au1-Au13           | 2.78475        |                | Au6-Au19                             | 2.78283        |  |  |
|                                      | <i>Sub-Average</i> | <i>2.79928</i> |                | <i>Sub-Average</i>                   | <i>2.78920</i> |  |  |
| <b>Average</b>                       | <b>2.83804</b>     |                | <b>Average</b> | <b>2.81705</b>                       |                |  |  |
| <b>Peripheral Au-Au bonds</b>        |                    |                |                |                                      |                |  |  |
| Au6-Au2                              |                    | 2.97994        | Au19-Au3       |                                      | 2.98191        |  |  |
| Au6-Au3                              |                    | 2.98150        | Au19-Au17      |                                      | 2.94184        |  |  |
| Au6-Au4                              |                    | 2.98171        | Au19-Au16      |                                      | 2.94452        |  |  |
| Au6-Au5                              |                    | 2.96298        | Au19-Au15      |                                      | 2.95804        |  |  |
| Au6-Au7                              |                    | 3.00875        | Au19-Au14      |                                      | 2.95433        |  |  |
| Au9-Au8                              |                    | 3.02612        | Au3-Au17       |                                      | 3.00807        |  |  |
| Au9-Au10                             |                    | 2.99068        | Au17-Au16      |                                      | 2.98701        |  |  |
| Au9-Au11                             |                    | 2.90047        | Au16-Au15      |                                      | 2.97290        |  |  |
| Au9-Au12                             |                    | 3.01108        | Au15-Au14      |                                      | 2.97639        |  |  |
| Au9-Au13                             |                    | 2.97994        | Au14-Au3       |                                      | 2.94415        |  |  |
| Au5-Au7                              |                    | 3.02026        | Au17-Au13      |                                      | 2.93517        |  |  |
| Au7-Au4                              |                    | 2.96895        | Au13-Au16      |                                      | 3.01323        |  |  |
| Au4-Au2                              |                    | 3.02613        | Au16-Au18      |                                      | 2.91179        |  |  |
| Au2-Au3                              |                    | 3.01108        | Au18-Au15      |                                      | 2.96689        |  |  |
| Au3-Au5                              |                    | 3.02421        | Au18-Au5       |                                      | 2.88812        |  |  |
| Au5-Au13                             |                    | 3.00874        | Au5-Au14       |                                      | 3.00365        |  |  |
| Au13-Au7                             |                    | 2.96297        | Au14-Au2       |                                      | 2.97782        |  |  |
| Au7-Au12                             |                    | 3.02421        | Au2-Au3        |                                      | 2.98728        |  |  |
| Au12-Au4                             |                    | 3.01212        | Au3-Au4        |                                      | 2.93665        |  |  |

|                             |                |                |                |
|-----------------------------|----------------|----------------|----------------|
| Au4-Au10                    | 2.98637        | Au4-Au17       | 2.98738        |
| Au10-Au2                    | 2.90046        | Au1-Au5        | 2.94961        |
| Au2-Au11                    | 2.99068        | Au1-Au18       | 2.90939        |
| Au11-Au3                    | 2.93193        | Au1-Au13       | 2.98948        |
| Au3-Au8                     | 3.01213        | Au1-Au4        | 2.96830        |
| Au8-Au5                     | 2.96896        | Au1-Au2        | 2.99319        |
| Au10-Au11                   | 2.98003        | Au2-Au5        | 2.94333        |
| Au10-Au12                   | 2.93193        | Au5-Au18       | 2.94156        |
| Au12-Au13                   | 2.98151        | Au18-Au13      | 2.96830        |
| Au13-Au8                    | 2.98171        | Au13-Au4       | 2.97509        |
| Au8-Au11                    | 2.98637        | Au4-Au2        | 2.95298        |
| <b>Average</b>              | <b>2.98446</b> | <b>Average</b> | <b>2.96228</b> |
| <b>Au-As or Au-Sb bonds</b> |                |                |                |
| Au12-As17                   | 2.47532        | Au3-Sb12       | 2.62274        |
| Au8-As21                    | 2.48352        | Au17-Sb21      | 2.61857        |
| Au9-As16                    | 2.45718        | Au16-Sb11      | 2.62423        |
| Au3-As14                    | 2.47532        | Au15-Sb20      | 2.60637        |
| Au5-As19                    | 2.46736        | Au14-Sb10      | 2.63306        |
| Au7-As20                    | 2.46736        | Au2-Sb9        | 2.62853        |
| Au4-As18                    | 2.48352        | Au13-Sb7       | 2.63614        |
| Au2-As15                    | 2.45718        | Au1-Sb8        | 2.61536        |
| <b>Average</b>              | <b>2.47134</b> | <b>Average</b> | <b>2.62313</b> |
| <b>Au-Cl bonds</b>          |                |                |                |
| Au13-Cl24                   | 2.43240        | Au19-Cl25      | 2.47519        |
| Au11-Cl22                   | 2.41028        | Au4-Cl22       | 2.47801        |
| Au10-Cl23                   | 2.41028        | Au18-Cl24      | 2.45727        |
| Au6-Cl168                   | 2.43240        | Au5-Cl23       | 2.45714        |
| <b>Average</b>              | <b>2.42134</b> | <b>Average</b> | <b>2.46690</b> |

**Table S4.** Selected orbitals of  $\text{Au}_{13}\text{As}_8$  and elemental contribution ratios (%).

|                                                                                     |    |    |    |                                                                                     |    |    |    |                                                                                       |    |    |    |
|-------------------------------------------------------------------------------------|----|----|----|-------------------------------------------------------------------------------------|----|----|----|---------------------------------------------------------------------------------------|----|----|----|
| <b>HOMO (-6.924 eV)</b><br><b>Superatomic 1P orbital</b>                            |    |    |    | <b>HOMO-1 (-7.004 eV)</b><br><b>Superatomic 1P orbital</b>                          |    |    |    | <b>HOMO-2 (-7.019 eV)</b><br><b>Superatomic 1P orbital</b>                            |    |    |    |
| 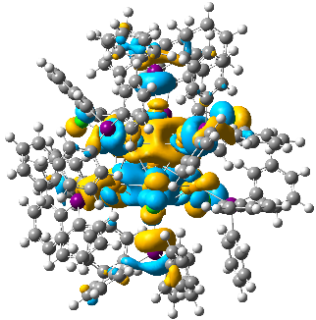   |    |    |    |    |    |    |    |    |    |    |    |
| 63                                                                                  | 16 | 7  | 13 | 65                                                                                  | 11 | 13 | 12 | 64                                                                                    | 12 | 8  | 16 |
| <b>HOMO-3 (-7.708 eV)</b>                                                           |    |    |    | <b>HOMO-4 (-7.751 eV)</b>                                                           |    |    |    | <b>HOMO-5 (-7.808 eV)</b>                                                             |    |    |    |
|   |    |    |    |   |    |    |    |   |    |    |    |
| 53                                                                                  | 11 | 9  | 27 | 57                                                                                  | 11 | 13 | 19 | 51                                                                                    | 14 | 4  | 31 |
| <b>HOMO-6 (-7.977 eV)</b>                                                           |    |    |    | <b>HOMO-7 (-8.011 eV)</b>                                                           |    |    |    | <b>HOMO-8 (-8.033 eV)</b>                                                             |    |    |    |
|  |    |    |    |  |    |    |    |  |    |    |    |
| 40                                                                                  | 5  | 26 | 30 | 42                                                                                  | 5  | 30 | 22 | 43                                                                                    | 2  | 43 | 12 |
| <b>HOMO-9 (-8.058 eV)</b>                                                           |    |    |    | <b>HOMO-10 (-8.096 eV)</b>                                                          |    |    |    | <b>HOMO-29 (-8.533 eV)</b>                                                            |    |    |    |
|  |    |    |    |  |    |    |    |  |    |    |    |
| 45                                                                                  | 5  | 26 | 24 | 51                                                                                  | 4  | 19 | 26 | 7                                                                                     | 0  | 11 | 82 |



|                                                                                     |                                                                                     |                                                                                      |
|-------------------------------------------------------------------------------------|-------------------------------------------------------------------------------------|--------------------------------------------------------------------------------------|
| HOMO-33 (-8.570 eV)                                                                 | HOMO-53 (-8.853 eV)                                                                 | LUMO (-3.603 eV)                                                                     |
| 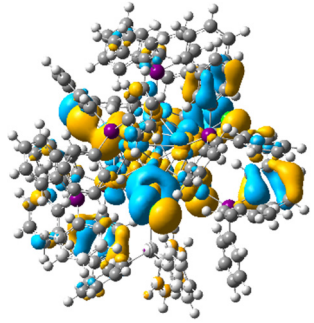   |    |    |
| 37   1   18   44                                                                    | 9   2   3   87                                                                      | 74   12   3   11                                                                     |
| LUMO+1 (-3.535 eV)                                                                  | LUMO+2 (-3.473 eV)                                                                  | LUMO+3 (-3.410 eV)                                                                   |
|    |    |    |
| 74   11   6   9                                                                     | 68   16   1   15                                                                    | 70   13   3   14                                                                     |
| LUMO+4 (-3.369 eV)                                                                  | LUMO+5 (-2.508 eV)                                                                  | LUMO+6 (2.447 eV)                                                                    |
|  |  |  |
| 73   12   3   12                                                                    | 48   17   0   35                                                                    | 41   16   1   42                                                                     |
| LUMO+7 (-2.361 eV)                                                                  | LUMO+16 (-2.929 eV)                                                                 | LUMO+22 (-1.798 eV)                                                                  |
|  |  |  |
| 47   16   1   36                                                                    | 21   9   1   69                                                                     | 4   4   0   92                                                                       |

Note: The isovalue and density were set to 0.015 and 0.0004, respectively. The four numbers (rounded to the nearest integers) below each orbital are the contribution ratios (%) for Au, As, Cl and C elements, respectively.

**Table S5.** Selected orbitals of  $\text{Au}_{13}\text{Sb}_8$  and elemental contribution ratios (%).

|                                                                                                                                            |    |    |    |                                                                                                                                              |    |    |    |                                                                                                                                                |    |    |    |
|--------------------------------------------------------------------------------------------------------------------------------------------|----|----|----|----------------------------------------------------------------------------------------------------------------------------------------------|----|----|----|------------------------------------------------------------------------------------------------------------------------------------------------|----|----|----|
| <b>HOMO (-6.899 eV)</b><br><b>Superatomic 1P orbital</b> 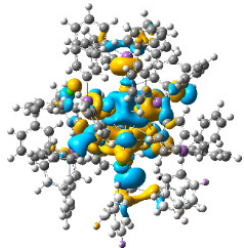 |    |    |    | <b>HOMO-1 (-7.043 eV)</b><br><b>Superatomic 1P orbital</b>  |    |    |    | <b>HOMO-2 (-7.098 eV)</b><br><b>Superatomic 1P orbital</b>  |    |    |    |
| 61                                                                                                                                         | 17 | 9  | 13 | 63                                                                                                                                           | 12 | 15 | 11 | 63                                                                                                                                             | 11 | 16 | 11 |
| <b>HOMO-3 (-7.782 eV)</b>                                 |    |    |    | <b>HOMO-4 (-7.806 eV)</b>                                   |    |    |    | <b>HOMO-5 (-7.880 eV)</b>                                   |    |    |    |
| 55                                                                                                                                         | 10 | 13 | 22 | 56                                                                                                                                           | 10 | 14 | 20 | 52                                                                                                                                             | 13 | 8  | 27 |
| <b>HOMO-6 (-8.012 eV)</b>                               |    |    |    | <b>HOMO-7 (-8.018 eV)</b>                                 |    |    |    | <b>HOMO-8 (-8.047 eV)</b>                                 |    |    |    |
| 33                                                                                                                                         | 3  | 43 | 21 | 37                                                                                                                                           | 2  | 52 | 9  | 39                                                                                                                                             | 4  | 36 | 21 |
| <b>HOMO-9 (-8.068 eV)</b>                               |    |    |    | <b>HOMO-10 (-8.107 eV)</b>                                |    |    |    | <b>HOMO-12 (-8.184 eV)</b>                                |    |    |    |
| 37                                                                                                                                         | 3  | 43 | 18 | 45                                                                                                                                           | 4  | 26 | 25 | 34                                                                                                                                             | 3  | 41 | 23 |
| <b>HOMO-23 (-8.417 eV)</b>                              |    |    |    | <b>HOMO-33 (-8.537 eV)</b>                                |    |    |    | <b>HOMO-36 (-8.556 eV)</b>                                |    |    |    |
| 9                                                                                                                                          | 1  | 13 | 77 | 1                                                                                                                                            | 0  | 1  | 97 | 7                                                                                                                                              | 0  | 8  | 85 |

|                                                                                     |    |   |    |                                                                                     |    |   |    |                                                                                       |    |   |    |
|-------------------------------------------------------------------------------------|----|---|----|-------------------------------------------------------------------------------------|----|---|----|---------------------------------------------------------------------------------------|----|---|----|
| HOMO-52 (-8.727 eV)                                                                 |    |   |    | HOMO-61 (-8.845 eV)                                                                 |    |   |    | LUMO (-3.806 eV)                                                                      |    |   |    |
| 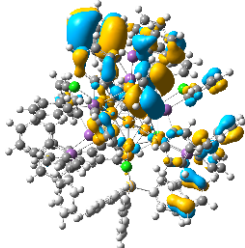   |    |   |    |    |    |   |    |    |    |   |    |
| 4                                                                                   | 1  | 0 | 95 | 15                                                                                  | 1  | 1 | 83 | 69                                                                                    | 17 | 4 | 10 |
| LUMO+1 (-3.692 eV)                                                                  |    |   |    | LUMO+2 (-3.591 eV)                                                                  |    |   |    | LUMO+3 (-3.573 eV)                                                                    |    |   |    |
|    |    |   |    |    |    |   |    |    |    |   |    |
| 67                                                                                  | 16 | 6 | 10 | 67                                                                                  | 18 | 3 | 13 | 65                                                                                    | 19 | 2 | 14 |
| LUMO+4 (-3.510 eV)                                                                  |    |   |    | LUMO+5 (-2.763 eV)                                                                  |    |   |    | LUMO+6 (-2.696 eV)                                                                    |    |   |    |
|   |    |   |    |   |    |   |    |   |    |   |    |
| 69                                                                                  | 16 | 6 | 9  | 47                                                                                  | 29 | 1 | 24 | 45                                                                                    | 28 | 1 | 26 |
| LUMO+7 (-2.582 eV)                                                                  |    |   |    | LUMO+8 (-2.389 eV)                                                                  |    |   |    | LUMO+11 (-2.198 eV)                                                                   |    |   |    |
|  |    |   |    |  |    |   |    |  |    |   |    |
| 43                                                                                  | 28 | 1 | 28 | 45                                                                                  | 26 | 1 | 29 | 4                                                                                     | 21 | 0 | 75 |
| LUMO+13 (-2.117 eV)                                                                 |    |   |    | LUMO+15 (-2.005 eV)                                                                 |    |   |    | LUMO+17 (-1.949 eV)                                                                   |    |   |    |
|  |    |   |    |  |    |   |    |  |    |   |    |
| 2                                                                                   | 20 | 0 | 78 | 5                                                                                   | 5  | 0 | 90 | 8                                                                                     | 10 | 0 | 81 |

Note: The isovalue and density were set to 0.015 and 0.0004, respectively. The four numbers (rounded to the nearest integers) below each orbital are the contribution ratios (%) for Au, Sb, Cl and C elements, respectively.

**Table S6.** Selected excited states, energy, oscillator strength, and the most probable transitions of **Au<sub>13</sub>As<sub>8</sub>** from TD-DFT calculations.

| State                                                                             | Energy (nm) | Energy (ev) | Oscillator strength (a.u.) | Most probable transitions | Weight of Transition | Nature of major transitions              |
|-----------------------------------------------------------------------------------|-------------|-------------|----------------------------|---------------------------|----------------------|------------------------------------------|
| <i>Transitions contributing to the long-wavelength tail of the peak at 417 nm</i> |             |             |                            |                           |                      |                                          |
| 1                                                                                 | 494.92      | 2.5051      | 0.0094                     | HOMO→LUMO                 | 0.82                 | MMCT (or superatomically metal-centered) |
| 3                                                                                 | 481.67      | 2.5741      | 0.0052                     | HOMO→LUMO+1               | 0.72                 |                                          |
| 6                                                                                 | 463.89      | 2.6727      | 0.0077                     | HOMO→LUMO+2               | 0.40                 |                                          |
|                                                                                   |             |             |                            | HOMO-2→LUMO+2             | 0.32                 |                                          |
| 8                                                                                 | 459.27      | 2.6996      | 0.0143                     | HOMO→LUMO+2               | 0.33                 |                                          |
|                                                                                   |             |             |                            | HOMO-1→LUMO+1             | 0.29                 |                                          |
| 11                                                                                | 448.64      | 2.7635      | 0.0091                     | HOMO-2→LUMO+3             | 0.50                 |                                          |
|                                                                                   |             |             |                            | HOMO-1→LUMO+4             | 0.27                 |                                          |
| 12                                                                                | 442.07      | 2.8046      | 0.0042                     | HOMO-1→LUMO+3             | 0.48                 |                                          |
|                                                                                   |             |             |                            | HOMO-2→LUMO+4             | 0.47                 |                                          |
| <i>Transitions contributing to the absorption peak at 417 nm</i>                  |             |             |                            |                           |                      |                                          |
| 13                                                                                | 420.78      | 2.9466      | 0.3186                     | HOMO-2→LUMO+2             | 0.37                 | MMCT (or superatomically metal-centered) |
|                                                                                   |             |             |                            | HOMO-1→LUMO+1             | 0.15                 |                                          |
|                                                                                   |             |             |                            | HOMO-1→LUMO+4             | 0.14                 |                                          |
|                                                                                   |             |             |                            | HOMO→LUMO                 | 0.10                 |                                          |
| 14                                                                                | 417.55      | 2.9694      | 0.1182                     | HOMO-2→LUMO+4             | 0.44                 |                                          |
|                                                                                   |             |             |                            | HOMO-1→LUMO+3             | 0.29                 |                                          |
| 15                                                                                | 415.87      | 2.9813      | 0.2156                     | HOMO-1→LUMO+4             | 0.37                 |                                          |
|                                                                                   |             |             |                            | HOMO-2→LUMO+3             | 0.24                 |                                          |
|                                                                                   |             |             |                            | HOMO→LUMO+2               | 0.12                 |                                          |
|                                                                                   |             |             |                            | HOMO-2→LUMO               | 0.09                 |                                          |
| <i>Transitions contributing to the absorption peak at 335 nm</i>                  |             |             |                            |                           |                      |                                          |
| 21                                                                                | 355.49      | 3.4877      | 0.0709                     | HOMO-4→LUMO+1             | 0.28                 | LMCT                                     |
|                                                                                   |             |             |                            | HOMO-3→LUMO+3             | 0.29                 |                                          |
|                                                                                   |             |             |                            | HOMO-3→LUMO+2             | 0.21                 |                                          |
| 23                                                                                | 351.11      | 3.5312      | 0.0784                     | HOMO-4→LUMO+2             | 0.80                 |                                          |
| 24                                                                                | 346.72      | 3.5759      | 0.0904                     | HOMO-3→LUMO+3             | 0.34                 |                                          |
|                                                                                   |             |             |                            | HOMO-4→LUMO+4             | 0.19                 |                                          |
| 27                                                                                | 342.50      | 3.6199      | 0.1547                     | HOMO-6→LUMO               | 0.49                 |                                          |
|                                                                                   |             |             |                            | HOMO-3→LUMO+4             | 0.13                 |                                          |
| 29                                                                                | 341.49      | 3.6307      | 0.1817                     | HOMO-3→LUMO+4             | 0.35                 |                                          |
|                                                                                   |             |             |                            | HOMO-8→LUMO               | 0.25                 |                                          |
| 30                                                                                | 340.15      | 3.6450      | 0.0954                     | HOMO-7→LUMO+1             | 0.40                 |                                          |
|                                                                                   |             |             |                            | HOMO-8→LUMO               | 0.14                 |                                          |
| 32                                                                                | 339.63      | 3.6506      | 0.1384                     | HOMO-9→LUMO               | 0.44                 |                                          |

|                                                                             |        |        |        |                |      |                  |
|-----------------------------------------------------------------------------|--------|--------|--------|----------------|------|------------------|
|                                                                             |        |        |        | HOMO-6→LUMO+1  | 0.34 |                  |
| 33                                                                          | 338.31 | 3.6649 | 0.4281 | HOMO-5→LUMO+2  | 0.41 |                  |
|                                                                             |        |        |        | HOMO-8→LUMO    | 0.17 |                  |
| 38                                                                          | 334.58 | 3.7057 | 0.0992 | HOMO-5→LUMO+4  | 0.41 |                  |
|                                                                             |        |        |        | HOMO-10→LUMO   | 0.23 |                  |
| 42                                                                          | 329.79 | 3.7595 | 0.1489 | HOMO-10→LUMO   | 0.32 |                  |
|                                                                             |        |        |        | HOMO-5→LUMO+4  | 0.25 |                  |
| 53                                                                          | 322.52 | 3.8442 | 0.1199 | HOMO→LUMO+7    | 0.17 |                  |
|                                                                             |        |        |        | HOMO-8→LUMO+3  | 0.12 |                  |
|                                                                             |        |        |        | HOMO-6→LUMO+3  | 0.12 |                  |
|                                                                             |        |        |        | HOMO-7→LUMO+4  | 0.09 |                  |
| 61                                                                          | 317.96 | 3.8994 | 0.0880 | HOMO-7→LUMO+4  | 0.28 |                  |
|                                                                             |        |        |        | HOMO→LUMO+7    | 0.13 |                  |
|                                                                             |        |        |        | HOMO-10→LUMO+4 | 0.13 |                  |
| <i>Transitions contributing to the featureless absorptions below 300 nm</i> |        |        |        |                |      |                  |
| 103                                                                         | 291.68 | 4.2507 | 0.0197 | HOMO→LUMO+12   | 0.61 | MLCT and<br>LMCT |
|                                                                             |        |        |        | HOMO-1→LUMO+8  | 0.25 |                  |
| 110                                                                         | 289.88 | 4.2770 | 0.0195 | HOMO→LUMO+13   | 0.36 |                  |
| 123                                                                         | 287.81 | 4.3078 | 0.0221 | HOMO-33→LUMO+2 | 0.32 |                  |
|                                                                             |        |        |        | HOMO-23→LUMO+2 | 0.12 |                  |
| 134                                                                         | 285.68 | 4.3399 | 0.0212 | HOMO-14→LUMO+4 | 0.24 |                  |
| 150                                                                         | 282.63 | 4.3867 | 0.0229 | HOMO-16→LUMO+3 | 0.21 |                  |
| 154                                                                         | 282.13 | 4.3946 | 0.0462 | HOMO→LUMO+16   | 0.36 |                  |
| 165                                                                         | 280.54 | 4.4196 | 0.0172 | HOMO-29→LUMO   | 0.46 |                  |
| 295                                                                         | 263.95 | 4.6973 | 0.0476 | HOMO-4→LUMO+7  | 0.26 |                  |
|                                                                             |        |        |        | HOMO-1→LUMO+22 | 0.22 |                  |
| 298                                                                         | 263.63 | 4.7030 | 0.0233 | HOMO-53→LUMO   | 0.46 |                  |

**Table S7.** Selected excited states, energy, oscillator strength, and the most probable transitions of  $\text{Au}_{13}\text{Sb}_8$  from TD-DFT calculations.

| State                                                                             | Energy (nm) | Energy (ev) | Oscillator strength (a.u.) | Most probable transitions | Weight of Transition | Nature of major transitions              |
|-----------------------------------------------------------------------------------|-------------|-------------|----------------------------|---------------------------|----------------------|------------------------------------------|
| <i>Transitions contributing to the long-wavelength tail of the peak at 435 nm</i> |             |             |                            |                           |                      |                                          |
| 1                                                                                 | 535.77      | 2.3141      | 0.0221                     | HOMO→LUMO                 | 0.89                 | MMCT (or superatomically metal-centered) |
| 3                                                                                 | 506.71      | 2.4469      | 0.0099                     | HOMO-1→LUMO               | 0.42                 |                                          |
|                                                                                   |             |             |                            | HOMO→LUMO+1               | 0.40                 |                                          |
| 5                                                                                 | 493.58      | 2.5119      | 0.0104                     | HOMO→LUMO+2               | 0.64                 |                                          |
| 8                                                                                 | 481.52      | 2.5748      | 0.0159                     | HOMO→LUMO+3               | 0.59                 |                                          |
| 10                                                                                | 464.16      | 2.6711      | 0.0252                     | HOMO-1→LUMO+2             | 0.40                 |                                          |
| <i>Transitions contributing to the absorption peak at 435 nm</i>                  |             |             |                            |                           |                      |                                          |
| 13                                                                                | 437.00      | 2.8372      | 0.3044                     | HOMO-1→LUMO+3             | 0.32                 | MMCT (or superatomically metal-centered) |
|                                                                                   |             |             |                            | HOMO-2→LUMO+1             | 0.20                 |                                          |
| 14                                                                                | 431.04      | 2.8764      | 0.1246                     | HOMO-1→LUMO+4             | 0.40                 |                                          |
|                                                                                   |             |             |                            | HOMO-2→LUMO+2             | 0.24                 |                                          |
| 15                                                                                | 427.55      | 2.8998      | 0.1679                     | HOMO-2→LUMO+4             | 0.65                 |                                          |
| <i>Transitions contributing to the absorption peak at 340 nm</i>                  |             |             |                            |                           |                      |                                          |
| 19                                                                                | 371.31      | 3.3391      | 0.0494                     | HOMO-5→LUMO               | 0.44                 | LMCT                                     |
|                                                                                   |             |             |                            | HOMO-3→LUMO+1             | 0.31                 |                                          |
| 27                                                                                | 356.65      | 3.4764      | 0.0121                     | HOMO-4→LUMO+2             | 0.40                 |                                          |
|                                                                                   |             |             |                            | HOMO-6→LUMO               | 0.18                 |                                          |
| 30                                                                                | 354.33      | 3.4992      | 0.0536                     | HOMO-4→LUMO+3             | 0.20                 |                                          |
|                                                                                   |             |             |                            | HOMO-7→LUMO+1             | 0.09                 |                                          |
|                                                                                   |             |             |                            | HOMO-3→LUMO+3             | 0.08                 |                                          |
| 35                                                                                | 348.85      | 3.5540      | 0.1007                     | HOMO-1→LUMO+5             | 0.15                 |                                          |
|                                                                                   |             |             |                            | HOMO-9→LUMO+1             | 0.09                 |                                          |
|                                                                                   |             |             |                            | HOMO-8→LUMO+1             | 0.08                 |                                          |
| 37                                                                                | 347.90      | 3.5638      | 0.1039                     | HOMO-3→LUMO+4             | 0.26                 |                                          |
|                                                                                   |             |             |                            | HOMO-2→LUMO+5             | 0.10                 |                                          |
|                                                                                   |             |             |                            | HOMO-5→LUMO+2             | 0.08                 |                                          |
| 41                                                                                | 345.41      | 3.5894      | 0.2407                     | HOMO-9→LUMO+1             | 0.25                 |                                          |
|                                                                                   |             |             |                            | HOMO-3→LUMO+4             | 0.18                 |                                          |
| 42                                                                                | 344.55      | 3.5985      | 0.0789                     | HOMO-2→LUMO+5             | 0.42                 |                                          |
|                                                                                   |             |             |                            | HOMO→LUMO+7               | 0.14                 |                                          |
| 45                                                                                | 340.01      | 3.6465      | 0.0843                     | HOMO-10→LUMO+1            | 0.63                 |                                          |
| 46                                                                                | 339.29      | 3.6542      | 0.1510                     | HOMO-2→LUMO+6             | 0.23                 |                                          |
|                                                                                   |             |             |                            | HOMO-5→LUMO+4             | 0.22                 |                                          |
| 47                                                                                | 338.61      | 3.6615      | 0.1461                     | HOMO-6→LUMO+2             | 0.14                 |                                          |
|                                                                                   |             |             |                            | HOMO-7→LUMO+2             | 0.15                 |                                          |

|                                                                             |        |        |        |                |      |                  |
|-----------------------------------------------------------------------------|--------|--------|--------|----------------|------|------------------|
|                                                                             |        |        |        | HOMO-5→LUMO+4  | 0.12 |                  |
|                                                                             |        |        |        | HOMO-2→LUMO+5  | 0.11 |                  |
| 48                                                                          | 337.92 | 3.6690 | 0.1185 | HOMO-5→LUMO+4  | 0.30 |                  |
|                                                                             |        |        |        | HOMO-2→LUMO+6  | 0.28 |                  |
| 50                                                                          | 336.18 | 3.6880 | 0.2049 | HOMO-7→LUMO+2  | 0.28 |                  |
|                                                                             |        |        |        | HOMO-7→LUMO+4  | 0.09 |                  |
| 51                                                                          | 335.56 | 3.6948 | 0.0734 | HOMO-6→LUMO+2  | 0.26 |                  |
|                                                                             |        |        |        | HOMO-2→LUMO+6  | 0.16 |                  |
| 52                                                                          | 334.70 | 3.7043 | 0.0630 | HOMO-7→LUMO+4  | 0.14 |                  |
|                                                                             |        |        |        | HOMO-7→LUMO+3  | 0.14 |                  |
|                                                                             |        |        |        | HOMO-6→LUMO+3  | 0.23 |                  |
| 55                                                                          | 332.86 | 3.7248 | 0.0680 | HOMO-9→LUMO+2  | 0.19 |                  |
|                                                                             |        |        |        | HOMO-12→LUMO+1 | 0.18 |                  |
| 66                                                                          | 325.19 | 3.8127 | 0.0551 | HOMO-2→LUMO+7  | 0.19 |                  |
|                                                                             |        |        |        | HOMO-8→LUMO+4  | 0.17 |                  |
| 87                                                                          | 310.31 | 3.9955 | 0.0572 | HOMO-2→LUMO+8  | 0.47 |                  |
| <i>Transitions contributing to the featureless absorptions below 300 nm</i> |        |        |        |                |      |                  |
| 126                                                                         | 296.65 | 4.1795 | 0.0173 | HOMO→LUMO+11   | 0.58 | MLCT and<br>LMCT |
|                                                                             |        |        |        | HOMO→LUMO+10   | 0.17 |                  |
| 144                                                                         | 292.70 | 4.2359 | 0.0132 | HOMO-33→LUMO   | 0.17 |                  |
| 152                                                                         | 290.93 | 4.2617 | 0.0186 | HOMO→LUMO+13   | 0.74 |                  |
| 182                                                                         | 285.76 | 4.3387 | 0.0158 | HOMO→LUMO+14   | 0.23 |                  |
|                                                                             |        |        |        | HOMO-4→LUMO+5  | 0.15 |                  |
| 196                                                                         | 284.25 | 4.3618 | 0.0139 | HOMO-23→LUMO+3 | 0.09 |                  |
|                                                                             |        |        |        | HOMO-33→LUMO+1 | 0.09 |                  |
|                                                                             |        |        |        | HOMO→LUMO+15   | 0.34 |                  |
| 216                                                                         | 281.82 | 4.3994 | 0.0433 | HOMO→LUMO+16   | 0.11 |                  |
|                                                                             |        |        |        | HOMO-1→LUMO+13 | 0.21 |                  |
| 220                                                                         | 281.35 | 4.4068 | 0.0201 | HOMO→LUMO+15   | 0.15 |                  |
|                                                                             |        |        |        | HOMO-2→LUMO+12 | 0.56 |                  |
| 224                                                                         | 280.93 | 4.4134 | 0.0125 | HOMO-1→LUMO+13 | 0.19 |                  |
|                                                                             |        |        |        | HOMO→LUMO+17   | 0.43 |                  |
| 236                                                                         | 279.58 | 4.4347 | 0.0106 | HOMO-52→LUMO   | 0.14 |                  |
|                                                                             |        |        |        | HOMO-2→LUMO+13 | 0.49 |                  |
| 256                                                                         | 277.32 | 4.4708 | 0.0090 | HOMO→LUMO+18   | 0.22 |                  |
|                                                                             |        |        |        | HOMO-3→LUMO+7  | 0.16 |                  |
| 286                                                                         | 274.00 | 4.5249 | 0.0095 | HOMO-36→LUMO+3 | 0.10 |                  |
| 294                                                                         | 273.20 | 4.5383 | 0.0124 | HOMO-61→LUMO   | 0.18 |                  |

**Table S8.** Cartesian coordinates of optimized **Au<sub>13</sub>As<sub>8</sub>** and **Au<sub>13</sub>Sb<sub>8</sub>**.

| <b>Au<sub>13</sub>As<sub>8</sub></b> |          |          |          | <b>Au<sub>13</sub>Sb<sub>8</sub></b> |          |          |          |
|--------------------------------------|----------|----------|----------|--------------------------------------|----------|----------|----------|
| Au                                   | 0        | 0.000002 | -0.14113 | Au                                   | 0.348507 | -2.37532 | -1.67019 |
| Au                                   | -0.26529 | -2.38504 | -1.6918  | Au                                   | -2.21613 | -1.75561 | -0.25677 |
| Au                                   | 2.277817 | -1.73199 | -0.21778 | Au                                   | -1.52999 | -0.17479 | 2.183317 |
| Au                                   | -2.59271 | -1.26194 | -0.11724 | Au                                   | 0.222926 | -2.35717 | 1.295395 |
| Au                                   | 1.501261 | -0.16275 | 2.248053 | Au                                   | -1.38125 | -0.17142 | -2.59268 |
| Au                                   | -0.21258 | -2.38079 | 1.28767  | Au                                   | 0.008135 | -0.00985 | -0.16791 |
| Au                                   | -1.50141 | 0.162698 | 2.247964 | Sb                                   | 4.880869 | -2.52127 | 0.00123  |
| Au                                   | 2.592694 | 1.26194  | -0.11705 | Sb                                   | 0.76913  | -4.41832 | -3.24795 |
| Au                                   | 0.265388 | 2.38508  | -1.69172 | Sb                                   | -4.19632 | -3.45901 | -0.5508  |
| Au                                   | -1.48591 | 0.109635 | -2.52809 | Sb                                   | -4.88299 | 2.465266 | -0.24461 |
| Au                                   | 1.486055 | -0.10958 | -2.528   | Sb                                   | 4.159981 | 3.514564 | -0.50837 |
| Au                                   | -2.27782 | 1.731988 | -0.21787 | Sb                                   | -2.83011 | -0.38402 | 4.451506 |
| Au                                   | 0.212484 | 2.380751 | 1.287751 | Au                                   | 2.596464 | -1.20834 | -0.08217 |
| As                                   | 4.177469 | -3.30164 | -0.45174 | Au                                   | -2.57421 | 1.200076 | -0.2015  |
| As                                   | -0.5628  | -4.30534 | -3.19568 | Au                                   | -0.27732 | 2.346443 | -1.70783 |
| As                                   | 0.563069 | 4.305394 | -3.19555 | Au                                   | 2.217136 | 1.778851 | -0.19334 |
| As                                   | -4.17745 | 3.301638 | -0.45194 | Au                                   | 1.454237 | 0.200854 | 2.225362 |
| As                                   | -4.7472  | -2.49717 | -0.1011  | Au                                   | 1.542173 | 0.142956 | -2.50565 |
| As                                   | 2.723854 | -0.32917 | 4.384746 | Au                                   | -0.28098 | 2.367055 | 1.250142 |
| As                                   | -2.72415 | 0.329068 | 4.384577 | Sb                                   | -0.62189 | 4.399848 | -3.27562 |
| As                                   | 4.747161 | 2.4972   | -0.10081 | Sb                                   | 2.650725 | 0.460881 | 4.54003  |
| Cl                                   | 2.766894 | 0.037252 | -4.5645  | Cl                                   | 0.277208 | -4.37477 | 2.733061 |
| Cl                                   | -2.76657 | -0.03723 | -4.5647  | Cl                                   | -2.74354 | -0.07014 | -4.63509 |
| Cl                                   | 0.323248 | 4.443927 | 2.571334 | Cl                                   | 3.163847 | 0.276873 | -4.34696 |
| C                                    | 0.498579 | -6.09069 | -1.2204  | Cl                                   | -0.38351 | 4.437514 | 2.602639 |
| C                                    | 0.396281 | -5.87044 | -2.59656 | C                                    | 6.276489 | -2.10155 | 1.55912  |
| C                                    | 1.120064 | -7.24211 | -0.74486 | C                                    | 6.239685 | -2.83594 | 2.760302 |
| C                                    | 1.558546 | -7.9447  | -3.00956 | C                                    | 7.181893 | -2.58618 | 3.76888  |
| C                                    | 1.64611  | -8.17125 | -1.63885 | C                                    | 8.169442 | -1.60763 | 3.584959 |
| C                                    | 0.936568 | -6.79601 | -3.49071 | C                                    | 8.204199 | -0.86719 | 2.393815 |
| H                                    | 0.098925 | -5.36699 | -0.51552 | C                                    | 7.256381 | -1.10308 | 1.387459 |
| H                                    | 1.200927 | -7.40206 | 0.324314 | C                                    | 6.179148 | -2.42232 | -1.68186 |
| H                                    | 2.130462 | -9.06791 | -1.2667  | C                                    | 7.531755 | -2.80817 | -1.57603 |
| H                                    | 1.975952 | -8.66169 | -3.7086  | C                                    | 8.368428 | -2.75536 | -2.69926 |
| H                                    | 0.8837   | -6.61952 | -4.55903 | C                                    | 7.865212 | -2.30905 | -3.93231 |
| C                                    | -5.96135 | -2.29552 | 1.401235 | C                                    | 6.523923 | -1.91543 | -4.03799 |
| C                                    | -5.88537 | -3.16843 | 2.488714 | C                                    | 5.679972 | -1.97376 | -2.91847 |
| C                                    | -6.80595 | -3.07227 | 3.528451 | C                                    | 4.603703 | -4.60754 | 0.332056 |
| C                                    | -7.88295 | -1.23356 | 2.405915 | C                                    | 3.352415 | -5.07116 | 0.778047 |
| C                                    | -6.95067 | -1.31025 | 1.375194 | C                                    | 3.151759 | -6.43778 | 1.029698 |
| C                                    | -7.81636 | -2.11513 | 3.481627 | C                                    | 4.199073 | -7.34813 | 0.833456 |
| H                                    | -8.5494  | -2.05882 | 4.279578 | C                                    | 5.451349 | -6.89057 | 0.389673 |
| H                                    | -6.73752 | -3.75553 | 4.367282 | C                                    | 5.655044 | -5.52659 | 0.139924 |
| H                                    | -7.01927 | -0.61811 | 0.543414 | C                                    | 2.744054 | -4.86762 | -3.91096 |
| H                                    | -8.66627 | -0.48512 | 2.357922 | C                                    | 3.606163 | -5.64638 | -3.11452 |
| H                                    | -5.12218 | -3.93755 | 2.520531 | C                                    | 4.886435 | -5.97655 | -3.58169 |



|   |          |          |          |   |          |          |          |
|---|----------|----------|----------|---|----------|----------|----------|
| C | 4.218387 | -4.75803 | 0.813895 | C | 5.316573 | -5.52779 | -4.83855 |
| C | 3.084674 | -5.01023 | 1.585067 | C | 4.465279 | -4.74156 | -5.62857 |
| C | 3.075279 | -6.06986 | 2.489744 | C | 3.183843 | -4.40857 | -5.16798 |
| C | 5.350409 | -5.5683  | 0.959179 | C | 0.199998 | -6.31565 | -2.47685 |
| C | 4.198131 | -6.88083 | 2.625067 | C | -0.59182 | -6.38089 | -1.31538 |
| C | 5.336131 | -6.62794 | 1.860427 | C | -0.98787 | -7.62288 | -0.79825 |
| H | 6.245939 | -5.36874 | 0.380268 | C | -0.59096 | -8.807   | -1.43554 |
| H | 6.214923 | -7.25541 | 1.965866 | C | 0.212066 | -8.74953 | -2.58541 |
| H | 4.190965 | -7.70817 | 3.327264 | C | 0.610495 | -7.50987 | -3.10371 |
| H | 2.182883 | -6.24608 | 3.080618 | C | -0.17885 | -4.22831 | -5.14161 |
| H | 2.200799 | -4.38779 | 1.494463 | C | -0.46232 | -5.35283 | -5.94096 |
| C | 3.883897 | -3.33709 | -3.30636 | C | -0.99856 | -5.1834  | -7.22446 |
| C | 4.602959 | -5.45245 | -2.3851  | C | -1.25891 | -3.89362 | -7.71614 |
| C | 4.701124 | -5.97338 | -3.67154 | C | -0.99302 | -2.77307 | -6.91716 |
| C | 3.994018 | -3.86116 | -4.59204 | C | -0.45301 | -2.93832 | -5.63249 |
| C | 4.406439 | -5.17758 | -4.77547 | C | -4.19839 | -4.38944 | -2.46388 |
| C | 4.203941 | -4.12792 | -2.20027 | C | -3.91021 | -3.60427 | -3.59779 |
| H | 4.82844  | -6.08286 | -1.5331  | C | -3.98093 | -4.17033 | -4.87897 |
| H | 3.548501 | -2.31118 | -3.18321 | C | -4.32571 | -5.51997 | -5.03457 |
| H | 4.489341 | -5.58549 | -5.77728 | C | -4.59258 | -6.30979 | -3.90606 |
| H | 5.009506 | -7.00428 | -3.80918 | C | -4.53058 | -5.7489  | -2.62278 |
| H | 3.743049 | -3.23616 | -5.44102 | C | -6.22717 | -2.80227 | -0.46447 |
| C | -4.46286 | -4.41068 | -0.0633  | C | -6.85115 | -2.29499 | -1.62134 |
| C | -5.42267 | -5.31196 | -0.52722 | C | -8.19493 | -1.89635 | -1.58111 |
| C | -3.11407 | -6.2577  | 0.718447 | C | -8.92834 | -2.00926 | -0.39015 |
| C | -3.30369 | -4.88778 | 0.549493 | C | -8.30725 | -2.5033  | 0.766437 |
| C | -4.07825 | -7.15342 | 0.267388 | C | -6.95874 | -2.88897 | 0.735664 |
| C | -5.22716 | -6.67896 | -0.36148 | C | -4.25065 | -5.09427 | 0.806999 |
| H | -2.54199 | -4.2031  | 0.908202 | C | -3.1341  | -5.34255 | 1.627481 |
| H | -3.93403 | -8.22058 | 0.39985  | C | -3.13315 | -6.43619 | 2.507191 |
| H | -2.21031 | -6.6065  | 1.205588 | C | -4.24665 | -7.28593 | 2.574553 |
| H | -5.97582 | -7.37479 | -0.72505 | C | -5.36674 | -7.03814 | 1.764091 |
| H | -6.31612 | -4.95658 | -1.0266  | C | -5.37178 | -5.9467  | 0.884334 |
| C | 1.679981 | -1.17765 | 5.775857 | C | -6.17004 | 2.090442 | -1.89547 |
| C | 0.324847 | -2.61578 | 7.743854 | C | -5.65935 | 1.422874 | -3.02352 |
| C | 0.880744 | -2.26721 | 5.421578 | C | -6.49036 | 1.160993 | -4.12338 |
| C | 1.777436 | -0.79387 | 7.113908 | C | -7.83218 | 1.566995 | -4.10504 |
| C | 0.213729 | -2.98952 | 6.407991 | C | -8.34749 | 2.230326 | -2.97923 |
| C | 1.098288 | -1.5121  | 8.093161 | C | -7.52288 | 2.488214 | -1.87568 |
| H | -0.39721 | -3.83707 | 6.120714 | C | -4.65899 | 4.578423 | -0.1208  |
| H | -0.19617 | -3.17915 | 8.510747 | C | -3.48712 | 5.096315 | 0.462616 |
| H | 2.371235 | 0.066891 | 7.397264 | C | -3.34548 | 6.479405 | 0.653498 |
| H | 1.177649 | -1.2083  | 9.131598 | C | -4.37065 | 7.350807 | 0.260524 |
| H | 0.772146 | -2.56807 | 4.383123 | C | -5.53624 | 6.838929 | -0.33164 |
| C | 4.335116 | -1.41244 | 4.437293 | C | -5.68178 | 5.458424 | -0.52415 |
| C | 5.594185 | -0.82416 | 4.306856 | C | -6.28603 | 2.195485 | 1.343769 |
| C | 5.384809 | -3.57274 | 4.714623 | C | -7.23833 | 1.159617 | 1.277231 |
| C | 6.641317 | -2.97778 | 4.627326 | C | -8.21318 | 1.034055 | 2.277392 |
| C | 4.235648 | -2.79323 | 4.626647 | C | -8.2343  | 1.925583 | 3.360244 |

|   |          |          |          |   |          |          |          |
|---|----------|----------|----------|---|----------|----------|----------|
| C | 6.741554 | -1.60541 | 4.418591 | C | -7.27026 | 2.941422 | 3.445223 |
| H | 3.264891 | -3.26549 | 4.725331 | C | -6.3011  | 3.079307 | 2.440648 |
| H | 5.294439 | -4.64348 | 4.858764 | C | 0.174215 | 6.204241 | -2.47938 |
| H | 7.536978 | -3.58291 | 4.720935 | C | 0.388167 | 6.279705 | -1.08936 |
| H | 7.714171 | -1.13126 | 4.346144 | C | 0.87064  | 7.463754 | -0.51206 |
| H | 5.692146 | 0.242466 | 4.139572 | C | 1.141466 | 8.578301 | -1.31901 |
| C | -4.19698 | -1.43287 | 6.186723 | C | 0.936472 | 8.505649 | -2.70589 |
| C | -3.30586 | -1.36189 | 5.109628 | C | 0.457304 | 7.322839 | -3.28665 |
| C | -3.17638 | -3.77483 | 5.071131 | C | -2.60185 | 4.988085 | -3.78636 |
| C | -2.80293 | -2.53701 | 4.551882 | C | -3.40038 | 4.10117  | -4.53699 |
| C | -4.0514  | -3.84186 | 6.151086 | C | -4.67578 | 4.498647 | -4.96124 |
| C | -4.56334 | -2.67012 | 6.706584 | C | -5.16127 | 5.775608 | -4.64082 |
| H | -4.61505 | -0.52728 | 6.613494 | C | -4.37345 | 6.653136 | -3.88292 |
| H | -5.24977 | -2.71839 | 7.545381 | C | -3.09729 | 6.261368 | -3.45134 |
| H | -4.33834 | -4.80518 | 6.560101 | C | 0.145368 | 4.172226 | -5.24391 |
| H | -2.77009 | -4.67572 | 4.623823 | C | 1.008917 | 3.102592 | -5.53859 |
| H | -2.1141  | -2.50147 | 3.714034 | C | 1.474276 | 2.913929 | -6.8482  |
| C | 5.91783  | 2.134476 | -1.59353 | C | 1.086913 | 3.795619 | -7.86645 |
| C | 7.251371 | 2.559526 | -1.60036 | C | 0.221233 | 4.863168 | -7.57762 |
| C | 5.411597 | 1.433735 | -2.68665 | C | -0.25616 | 5.048061 | -6.2733  |
| C | 8.057623 | 2.302264 | -2.70426 | C | 4.345318 | 5.055921 | 0.941014 |
| C | 6.223151 | 1.17219  | -3.78873 | C | 3.357954 | 5.176578 | 1.937432 |
| C | 7.543926 | 1.610847 | -3.80073 | C | 3.430733 | 6.212525 | 2.880937 |
| H | 5.804836 | 0.628929 | -4.62907 | C | 4.489659 | 7.130015 | 2.839884 |
| H | 8.176285 | 1.411517 | -4.65981 | C | 5.476357 | 7.01642  | 1.8474   |
| H | 9.089129 | 2.638682 | -2.70599 | C | 5.404826 | 5.987094 | 0.898999 |
| H | 7.669769 | 3.072707 | -0.74115 | C | 6.119777 | 2.667231 | -0.62227 |
| H | 4.3846   | 1.0847   | -2.69785 | C | 6.372322 | 1.70499  | -1.62176 |
| C | -0.49898 | 6.090641 | -1.22053 | C | 7.664825 | 1.189364 | -1.79534 |
| C | -0.39629 | 5.870419 | -2.59666 | C | 8.713402 | 1.622058 | -0.96912 |
| C | -0.9364  | 6.795964 | -3.49095 | C | 8.46087  | 2.557255 | 0.045359 |
| C | -1.12068 | 7.242014 | -0.74514 | C | 7.16869  | 3.07633  | 0.222591 |
| C | -1.5586  | 7.944596 | -3.00996 | C | 4.142307 | 4.62011  | -2.3342  |
| C | -1.64656 | 8.171125 | -1.63927 | C | 4.174084 | 6.027584 | -2.33373 |
| H | -0.09947 | 5.366961 | -0.51555 | C | 4.241424 | 6.729038 | -3.54616 |
| H | -0.88323 | 6.61949  | -4.55925 | C | 4.273466 | 6.034034 | -4.76312 |
| H | -1.97587 | 8.661561 | -3.7091  | C | 4.217024 | 4.633069 | -4.76699 |
| H | -2.13108 | 9.067742 | -1.26724 | C | 4.145253 | 3.924444 | -3.5595  |
| H | -1.20185 | 7.401946 | 0.324009 | C | 1.500358 | 1.33523  | 6.10037  |
| C | -5.33646 | 6.627724 | 1.860365 | C | 0.695359 | 2.453786 | 5.805349 |
| C | -5.3506  | 5.568176 | 0.959005 | C | 0.009465 | 3.113218 | 6.836044 |
| C | -4.21855 | 4.757923 | 0.813814 | C | 0.117038 | 2.659627 | 8.158829 |
| C | -4.19858 | 6.880529 | 2.625213 | C | 0.903461 | 1.535478 | 8.451069 |
| C | -3.07571 | 6.069573 | 2.489984 | C | 1.593041 | 0.871506 | 7.426266 |
| C | -3.08496 | 5.010035 | 1.585192 | C | 4.380008 | 1.703719 | 4.648509 |
| H | -2.20108 | 4.387594 | 1.49467  | C | 4.413316 | 2.817932 | 5.509006 |
| H | -2.18341 | 6.245715 | 3.081024 | C | 5.565352 | 3.614285 | 5.587688 |
| H | -4.19152 | 7.707787 | 3.3275   | C | 6.689981 | 3.304815 | 4.809961 |
| H | -6.21527 | 7.255183 | 1.965732 | C | 6.659146 | 2.198005 | 3.948995 |

|    |          |          |          |   |          |          |          |
|----|----------|----------|----------|---|----------|----------|----------|
| H  | -6.24604 | 5.368677 | 0.379935 | C | 5.509116 | 1.401557 | 3.862704 |
| C  | -2.67035 | -6.31445 | -3.3495  | C | 3.397719 | -1.34161 | 5.385868 |
| C  | -2.3578  | -4.96286 | -3.49106 | C | 4.37464  | -1.31292 | 6.401256 |
| C  | -3.93398 | -6.7748  | -3.71279 | C | 4.844638 | -2.51064 | 6.958324 |
| C  | -3.3145  | -4.06866 | -3.97965 | C | 4.352702 | -3.74291 | 6.497736 |
| C  | -4.88255 | -5.88942 | -4.2133  | C | 3.391308 | -3.77548 | 5.476967 |
| C  | -4.57418 | -4.53653 | -4.33968 | C | 2.912344 | -2.57879 | 4.922501 |
| H  | -3.07564 | -3.0154  | -4.10149 | C | -3.5647  | 1.443319 | 5.250061 |
| H  | -1.9311  | -7.01034 | -2.96914 | C | -3.05892 | 2.654868 | 4.742343 |
| H  | -5.31289 | -3.84008 | -4.71994 | C | -3.50433 | 3.879244 | 5.262452 |
| H  | -5.86302 | -6.25116 | -4.50492 | C | -4.45454 | 3.901209 | 6.293417 |
| H  | -4.17102 | -7.82824 | -3.60831 | C | -4.96454 | 2.695606 | 6.801972 |
| C  | -3.99371 | 3.861512 | -4.59219 | C | -4.52519 | 1.470072 | 6.282066 |
| C  | -3.8837  | 3.337323 | -3.30655 | C | -1.7501  | -1.27534 | 6.055396 |
| C  | -4.60263 | 5.45266  | -2.38514 | C | -0.88348 | -2.35099 | 5.780101 |
| C  | -4.20373 | 4.128079 | -2.2004  | C | -0.24849 | -3.02588 | 6.833754 |
| C  | -4.406   | 5.177988 | -4.77552 | C | -0.46797 | -2.62952 | 8.160323 |
| C  | -4.70067 | 5.973719 | -3.67154 | C | -1.31609 | -1.54609 | 8.43457  |
| H  | -4.48881 | 5.585992 | -5.7773  | C | -1.95504 | -0.86807 | 7.387269 |
| H  | -3.74276 | 3.23656  | -5.4412  | C | -4.57783 | -1.60992 | 4.528098 |
| H  | -5.00895 | 7.004658 | -3.8091  | C | -4.44784 | -2.98854 | 4.789563 |
| H  | -4.8281  | 6.083016 | -1.5331  | C | -5.58635 | -3.80178 | 4.877546 |
| H  | -3.54841 | 2.311362 | -3.18347 | C | -6.86409 | -3.24487 | 4.715949 |
| Cl | -0.32346 | -4.44399 | 2.571199 | C | -6.99716 | -1.87539 | 4.444832 |
| C  | 0.671451 | -2.8221  | -5.34343 | C | -5.86018 | -1.06021 | 4.339471 |
| C  | -0.04249 | -3.97456 | -5.02437 | H | 4.264446 | 7.813668 | -3.53512 |
| C  | -0.43621 | -4.85291 | -6.03995 | H | 4.329353 | 6.577845 | -5.70029 |
| C  | 1.006505 | -2.55201 | -6.66818 | H | 4.137253 | 6.584548 | -1.40399 |
| C  | 0.63511  | -3.4382  | -7.67415 | H | 4.07982  | 2.840668 | -3.59846 |
| C  | -0.08627 | -4.58857 | -7.35943 | H | 4.217643 | 4.088138 | -5.70393 |
| H  | 1.548531 | -1.64061 | -6.89531 | H | -0.09246 | 5.539342 | -8.36619 |
| H  | 0.892859 | -3.22731 | -8.70675 | H | -0.95928 | 5.852303 | -6.0763  |
| H  | -1.03575 | -5.72731 | -5.80831 | H | 2.127844 | 2.07431  | -7.058   |
| H  | 0.958728 | -2.11577 | -4.57294 | H | 1.444365 | 3.647072 | -8.88025 |
| H  | -0.39202 | -5.27274 | -8.1439  | H | -2.50051 | 6.95006  | -2.86194 |
| C  | -1.68035 | 1.177436 | 5.775802 | H | -4.74669 | 7.638668 | -3.62513 |
| C  | -1.77791 | 0.793597 | 7.113829 | H | -6.1467  | 6.081103 | -4.97695 |
| C  | -0.32529 | 2.615417 | 7.743964 | H | -5.28538 | 3.811673 | -5.53747 |
| C  | -0.88104 | 2.26698  | 5.421632 | H | -3.04052 | 3.110741 | -4.80313 |
| C  | -0.21406 | 2.989214 | 6.408127 | H | 0.18077  | 5.428629 | -0.44624 |
| C  | -1.0988  | 1.511759 | 8.093164 | H | 1.033005 | 7.506149 | 0.559443 |
| H  | 0.195701 | 3.178732 | 8.51092  | H | 1.511815 | 9.49545  | -0.87256 |
| H  | 0.396941 | 3.836746 | 6.120933 | H | 1.149204 | 9.364936 | -3.33352 |
| H  | -2.37177 | -0.06715 | 7.397103 | H | 0.318962 | 7.279953 | -4.36231 |
| H  | -1.17825 | 1.207909 | 9.131581 | H | 2.519329 | 4.488258 | 1.983576 |
| H  | -0.77235 | 2.567892 | 4.383199 | H | 2.656658 | 6.295351 | 3.635913 |
| C  | 4.196455 | 1.432735 | 6.187107 | H | 4.545218 | 7.930288 | 3.570652 |
| C  | 3.305443 | 1.361776 | 5.109925 | H | 6.294096 | 7.728581 | 1.807169 |
| C  | 2.802508 | 2.536902 | 4.5522   | H | 6.168458 | 5.926029 | 0.12942  |

|   |          |          |          |   |          |          |          |
|---|----------|----------|----------|---|----------|----------|----------|
| C | 4.562712 | 2.669975 | 6.707068 | H | 5.579332 | 1.349526 | -2.27408 |
| C | 3.175851 | 3.774705 | 5.071548 | H | 7.846739 | 0.455264 | -2.57235 |
| C | 4.050771 | 3.841722 | 6.151586 | H | 9.715374 | 1.231998 | -1.11484 |
| H | 4.614518 | 0.52714  | 6.613872 | H | 9.26762  | 2.893704 | 0.689176 |
| H | 5.249069 | 2.718231 | 7.545932 | H | 6.991203 | 3.794415 | 1.015996 |
| H | 4.33764  | 4.805031 | 6.560679 | H | -2.67981 | 4.443644 | 0.783272 |
| H | 2.769567 | 4.675607 | 4.624254 | H | -2.43936 | 6.859561 | 1.111758 |
| H | 2.113753 | 2.501377 | 3.714291 | H | -4.26357 | 8.419935 | 0.412305 |
| C | -0.67041 | 2.821988 | -5.34363 | H | -6.32963 | 7.511161 | -0.64172 |
| C | 0.437091 | 4.852992 | -6.03984 | H | -6.58512 | 5.082984 | -0.99357 |
| C | 0.087541 | 4.588618 | -7.35941 | H | -4.62447 | 1.096674 | -3.0699  |
| C | -0.63356 | 3.438128 | -7.67433 | H | -6.07776 | 0.643229 | -4.9826  |
| C | -1.00507 | 2.551863 | -6.66848 | H | -8.47346 | 1.367325 | -4.95761 |
| C | 0.043258 | 3.974565 | -5.02437 | H | -9.3867  | 2.542195 | -2.95827 |
| H | 1.036429 | 5.727492 | -5.80803 | H | -7.94512 | 2.977526 | -1.00298 |
| H | 0.393378 | 5.272848 | -8.14379 | H | -5.57781 | 3.885335 | 2.512447 |
| H | -0.89101 | 3.227207 | -8.70701 | H | -7.27435 | 3.630029 | 4.283063 |
| H | -1.54687 | 1.640374 | -6.89576 | H | -8.99499 | 1.8336   | 4.128711 |
| H | -0.95775 | 2.115593 | -4.57323 | H | -8.95501 | 0.246442 | 2.200789 |
| C | -6.66106 | 2.59278  | 0.880292 | H | -7.2456  | 0.460981 | 0.4465   |
| C | -6.62314 | 2.116996 | -1.48592 | H | -4.9412  | 0.547427 | 6.675835 |
| C | -7.93542 | 1.658665 | -1.41432 | H | -5.70055 | 2.708241 | 7.599289 |
| C | -7.98159 | 2.156335 | 0.941613 | H | -4.79596 | 4.848353 | 6.698719 |
| C | -5.98402 | 2.598196 | -0.34098 | H | -3.10247 | 4.802145 | 4.85826  |
| C | -8.62296 | 1.692173 | -0.20367 | H | -2.31593 | 2.66607  | 3.950278 |
| H | -8.507   | 2.187104 | 1.88998  | H | 0.592693 | 2.825688 | 4.788678 |
| H | -9.65404 | 1.358089 | -0.15474 | H | -0.60651 | 3.973229 | 6.599503 |
| H | -8.42033 | 1.284948 | -2.30906 | H | -0.41257 | 3.174148 | 8.953877 |
| H | -6.17598 | 2.948149 | 1.78256  | H | 0.981048 | 1.174135 | 9.471229 |
| H | -6.10983 | 2.1148   | -2.44073 | H | 2.186686 | -0.00469 | 7.666304 |
| C | -6.22316 | -1.17184 | -3.78893 | H | 3.553073 | 3.068988 | 6.12087  |
| C | -5.41162 | -1.43346 | -2.68685 | H | 5.581409 | 4.470545 | 6.25372  |
| C | -5.91783 | -2.13438 | -1.59383 | H | 7.5812   | 3.920447 | 4.874365 |
| C | -7.25134 | -2.55953 | -1.60076 | H | 7.524468 | 1.947957 | 3.345699 |
| C | -8.05758 | -2.30219 | -2.70466 | H | 5.512426 | 0.547503 | 3.192003 |
| C | -7.5439  | -1.6106  | -3.80102 | H | -0.69412 | -2.68131 | 4.761607 |
| H | -7.66973 | -3.07285 | -0.74163 | H | 0.413764 | -3.85446 | 6.610538 |
| H | -4.38465 | -1.08434 | -2.69797 | H | 0.021057 | -3.15658 | 8.972978 |
| H | -5.80485 | -0.62844 | -4.62918 | H | -1.48174 | -1.22903 | 9.459048 |
| H | -9.08906 | -2.63869 | -2.70647 | H | -2.59593 | -0.0233  | 7.616977 |
| H | -8.17624 | -1.41121 | -4.6601  | H | -5.47368 | -4.86157 | 5.078691 |
| C | 6.660925 | -2.59294 | 0.880869 | H | -7.74496 | -3.87247 | 4.803891 |
| C | 7.981448 | -2.15651 | 0.942396 | H | -7.98063 | -1.43484 | 4.320324 |
| C | 8.622956 | -1.69223 | -0.20276 | H | -5.98948 | -0.00407 | 4.126792 |
| C | 7.935565 | -1.65858 | -1.41348 | H | -3.47086 | -3.43607 | 4.94295  |
| C | 6.62329  | -2.1169  | -1.48529 | H | 4.718322 | -4.66873 | 6.930309 |
| C | 5.98403  | -2.59822 | -0.34049 | H | 5.591465 | -2.48157 | 7.745129 |
| H | 9.654031 | -1.35815 | -0.15367 | H | 4.780818 | -0.36788 | 6.749857 |
| H | 8.506746 | -2.18739 | 1.890822 | H | 2.164021 | -2.63282 | 4.137094 |

|   |          |          |          |   |          |          |          |
|---|----------|----------|----------|---|----------|----------|----------|
| H | 6.175736 | -2.94841 | 1.783041 | H | 3.008281 | -4.72042 | 5.106526 |
| H | 8.420578 | -1.28477 | -2.30813 | H | 5.494439 | -3.60973 | 2.914337 |
| H | 6.110092 | -2.1146  | -2.44016 | H | 7.142259 | -3.15651 | 4.690147 |
| C | 4.462782 | 4.410709 | -0.06299 | H | 8.903345 | -1.42301 | 4.362341 |
| C | 5.422544 | 5.312019 | -0.52694 | H | 8.969386 | -0.11332 | 2.239845 |
| C | 5.226989 | 6.679007 | -0.36123 | H | 7.30303  | -0.52027 | 0.472856 |
| C | 4.078071 | 7.153441 | 0.267649 | H | 4.650502 | -1.64868 | -3.0322  |
| C | 3.113925 | 6.257689 | 0.718739 | H | 6.123473 | -1.55783 | -4.97994 |
| C | 3.303597 | 4.887777 | 0.549804 | H | 8.515608 | -2.26476 | -4.79989 |
| H | 3.933813 | 8.220599 | 0.400094 | H | 9.407505 | -3.0556  | -2.61045 |
| H | 2.210161 | 6.606465 | 1.205887 | H | 7.94588  | -3.1275  | -0.62425 |
| H | 5.97561  | 7.374867 | -0.72482 | H | 3.289636 | -6.01138 | -2.14214 |
| H | 2.541921 | 4.203075 | 0.908528 | H | 5.540438 | -6.58099 | -2.96281 |
| H | 6.316    | 4.956658 | -1.02633 | H | 6.30794  | -5.78414 | -5.19707 |
| C | -5.38502 | 3.572712 | 4.714398 | H | 4.793434 | -4.38903 | -6.60064 |
| C | -6.64154 | 2.977781 | 4.62709  | H | 2.535048 | -3.80665 | -5.79623 |
| C | -6.74181 | 1.605417 | 4.418349 | H | -0.2792  | -6.35717 | -5.57338 |
| C | -5.59447 | 0.824142 | 4.306617 | H | -1.21027 | -6.05328 | -7.83774 |
| C | -4.33538 | 1.412384 | 4.437069 | H | -1.67065 | -3.76547 | -8.71192 |
| C | -4.23588 | 2.793172 | 4.626432 | H | -1.2106  | -1.77306 | -7.27437 |
| H | -3.26511 | 3.265405 | 4.725133 | H | -0.26723 | -2.05586 | -5.02824 |
| H | -5.69245 | -0.24249 | 4.139335 | H | -3.61923 | -2.56053 | -3.5102  |
| H | -5.29462 | 4.643448 | 4.858547 | H | -3.74986 | -3.55726 | -5.74212 |
| H | -7.53719 | 3.582934 | 4.720696 | H | -4.37339 | -5.95594 | -6.02682 |
| H | -7.71444 | 1.131292 | 4.345895 | H | -4.84527 | -7.35866 | -4.02195 |
| C | 4.883026 | 5.889757 | -4.21187 | H | -4.72834 | -6.37784 | -1.76096 |
| C | 4.574766 | 4.536846 | -4.33838 | H | -6.30977 | -2.22254 | -2.55941 |
| C | 3.314995 | 4.068905 | -3.97876 | H | -6.49797 | -3.26603 | 1.64314  |
| C | 2.358094 | 4.963044 | -3.49047 | H | -8.86805 | -2.59782 | 1.690565 |
| C | 2.67052  | 6.314649 | -3.34877 | H | -9.97325 | -1.71764 | -0.36683 |
| C | 3.934249 | 6.775077 | -3.71165 | H | -8.66486 | -1.50684 | -2.47749 |
| H | 4.171201 | 7.828525 | -3.60708 | H | -6.25084 | -5.76208 | 0.274068 |
| H | 1.93112  | 7.010499 | -2.96862 | H | -6.23208 | -7.69082 | 1.815779 |
| H | 5.863571 | 6.251554 | -4.50317 | H | -4.24529 | -8.13257 | 3.253494 |
| H | 5.313645 | 3.840448 | -4.7184  | H | -2.26287 | -6.60867 | 3.131091 |
| H | 3.076243 | 3.015628 | -4.10067 | H | -2.2601  | -4.69766 | 1.604515 |
| C | 5.961294 | 2.295547 | 1.401541 | H | 1.322656 | 2.400772 | -4.77262 |
| C | 5.885252 | 3.168404 | 2.489062 | H | 2.524482 | -4.38847 | 0.943984 |
| C | 6.950703 | 1.310369 | 1.375447 | H | 6.62787  | -5.19341 | -0.20721 |
| C | 6.80584  | 3.072272 | 3.528791 | H | 6.26581  | -7.5925  | 0.24219  |
| H | 5.122003 | 3.93746  | 2.520914 | H | 2.181707 | -6.77183 | 1.379619 |
| C | 7.88299  | 1.233708 | 2.406159 | H | 4.044799 | -8.4047  | 1.025893 |
| H | 7.019363 | 0.618281 | 0.543627 | H | 1.255715 | -7.4832  | -3.97684 |
| C | 7.816338 | 2.115218 | 3.481915 | H | 0.531395 | -9.66445 | -3.07347 |
| H | 6.737364 | 3.755481 | 4.367653 | H | -0.89734 | -9.76806 | -1.03562 |
| H | 8.666384 | 0.485338 | 2.358123 | H | -1.59694 | -7.65952 | 0.098217 |
| H | 8.549387 | 2.058934 | 4.279858 | H | -0.88877 | -5.47215 | -0.79977 |

**Table S9.** Natural Population charges for  $\text{Au}_{13}\text{As}_8$  and  $\text{Au}_{13}\text{Sb}_8$ .

| $\text{Au}_{13}\text{As}_8$ |                      |                  | $\text{Au}_{13}\text{Sb}_8$ |                      |                  |
|-----------------------------|----------------------|------------------|-----------------------------|----------------------|------------------|
|                             |                      |                  |                             |                      |                  |
| Atom                        |                      | Natural Charge   | Atom                        |                      | Natural Charge   |
| central                     | Au1                  | -2.12338         | central                     | Au6                  | -2.11650         |
| As-bonded                   | Au2                  | 0.11242          | Sb-bonded                   | Au1                  | -0.02581         |
|                             | Au3                  | 0.12980          |                             | Au2                  | 0.00244          |
|                             | Au4                  | 0.12709          |                             | Au3                  | -0.00304         |
|                             | Au5                  | 0.11865          |                             | Au13                 | 0.00312          |
|                             | Au7                  | 0.11865          |                             | Au14                 | -0.00312         |
|                             | Au8                  | 0.12710          |                             | Au15                 | -0.02604         |
|                             | Au9                  | 0.11242          |                             | Au16                 | -0.00512         |
|                             | Au12                 | 0.12980          |                             | Au17                 | -0.00512         |
|                             | <i>Sub-total</i>     | <i>0.97593</i>   |                             | <i>Sub-total</i>     | <i>-0.06269</i>  |
| Cl-bonded                   | Au6                  | 0.15277          | Cl-bonded                   | Au4                  | 0.17111          |
|                             | Au10                 | 0.17016          |                             | Au5                  | 0.20298          |
|                             | Au11                 | 0.17015          |                             | Au18                 | 0.19987          |
|                             | Au13                 | 0.15277          |                             | Au19                 | 0.17327          |
|                             |                      | <i>Sub-total</i> |                             | <i>0.64585</i>       |                  |
| <b>Total for all Au</b>     |                      | <b>-0.50160</b>  | <b>Total for all Au</b>     |                      | <b>-1.43196</b>  |
|                             | As14                 | 1.11853          |                             | Sb7                  | 1.60701          |
|                             | As15                 | 1.13783          |                             | Sb8                  | 1.63460          |
|                             | As16                 | 1.13783          |                             | Sb9                  | 1.60733          |
|                             | As17                 | 1.11853          |                             | Sb10                 | 1.61063          |
|                             | As18                 | 1.11877          |                             | Sb11                 | 1.61069          |
|                             | As19                 | 1.12219          |                             | Sb12                 | 1.61920          |
|                             | As20                 | 1.12219          |                             | Sb20                 | 1.64111          |
|                             | As21                 | 1.11877          |                             | Sb21                 | 1.61968          |
|                             | <b>Total for As</b>  | <b>8.99464</b>   |                             | <b>Total for Sb</b>  | <b>12.95025</b>  |
|                             | Cl22                 | -0.54213         |                             | Cl22                 | -0.57386         |
|                             | Cl23                 | -0.54213         |                             | Cl23                 | -0.54859         |
|                             | Cl24                 | -0.57071         |                             | Cl24                 | -0.54959         |
|                             | Cl168                | -0.57071         |                             | Cl25                 | -0.56982         |
|                             | <b>Total for Cl</b>  | <b>-2.22568</b>  |                             | <b>Total for Cl</b>  | <b>-2.24186</b>  |
|                             | <b>Total for C</b>   | <b>-36.56340</b> |                             | <b>Total for C</b>   | <b>-38.96133</b> |
|                             | <b>Total for H</b>   | <b>31.29594</b>  |                             | <b>Total for H</b>   | <b>31.16375</b>  |
|                             | <b>Total for all</b> | <b>1</b>         |                             | <b>Total for all</b> | <b>1</b>         |

**Table S10.** Mulliken charges for  $\text{Au}_{13}\text{As}_8$  and  $\text{Au}_{13}\text{Sb}_8$ .

| $\text{Au}_{13}\text{As}_8$ |                      |                  | $\text{Au}_{13}\text{Sb}_8$ |                      |                  |
|-----------------------------|----------------------|------------------|-----------------------------|----------------------|------------------|
|                             |                      |                  |                             |                      |                  |
| Atom                        |                      | Mulliken Charge  | Atom                        |                      | Mulliken Charge  |
| central                     | Au1                  | 4.11665          | central                     | Au6                  | 5.07580          |
| As-bonded                   | Au2                  | -0.30978         | Sb-bonded                   | Au1                  | -0.41133         |
|                             | Au3                  | -0.43702         |                             | Au2                  | -0.56941         |
|                             | Au4                  | -0.46671         |                             | Au3                  | -0.51546         |
|                             | Au5                  | -0.29256         |                             | Au13                 | -0.45585         |
|                             | Au7                  | -0.29263         |                             | Au14                 | -0.50828         |
|                             | Au8                  | -0.46664         |                             | Au15                 | -0.43740         |
|                             | Au9                  | -0.30970         |                             | Au16                 | -0.56803         |
|                             | Au12                 | -0.43695         |                             | Au17                 | -0.45241         |
|                             | <i>Sub-total</i>     | <i>-3.01199</i>  |                             | <i>Sub-total</i>     | <i>-3.91817</i>  |
| Cl-bonded                   | Au6                  | -0.79378         | Cl-bonded                   | Au4                  | -0.97794         |
|                             | Au10                 | -0.73396         |                             | Au5                  | -0.72849         |
|                             | Au11                 | -0.73386         |                             | Au18                 | -0.79436         |
|                             | Au13                 | -0.79384         |                             | Au19                 | -0.92597         |
|                             |                      | <i>Sub-total</i> |                             | <i>-3.05544</i>      |                  |
| <b>Total for all Au</b>     |                      | <b>-1.95078</b>  | <b>Total for all Au</b>     |                      | <b>-2.26913</b>  |
|                             | As14                 | 0.410090         |                             | Sb7                  | 0.887604         |
|                             | As15                 | 0.415329         |                             | Sb8                  | 0.907113         |
|                             | As16                 | 0.415339         |                             | Sb9                  | 0.872512         |
|                             | As17                 | 0.410082         |                             | Sb10                 | 0.891191         |
|                             | As18                 | 0.411342         |                             | Sb11                 | 0.891703         |
|                             | As19                 | 0.406551         |                             | Sb12                 | 0.881672         |
|                             | As20                 | 0.406557         |                             | Sb20                 | 0.915651         |
|                             | As21                 | 0.411324         |                             | Sb21                 | 0.887162         |
|                             | <b>Total for As</b>  | <b>3.286614</b>  |                             | <b>Total for Sb</b>  | <b>7.134608</b>  |
|                             | Cl22                 | -0.30776         |                             | Cl22                 | -0.34714         |
|                             | Cl23                 | -0.30774         |                             | Cl23                 | -0.32198         |
|                             | Cl24                 | -0.33735         |                             | Cl24                 | -0.32852         |
|                             | Cl168                | -0.33736         |                             | Cl25                 | -0.34098         |
|                             | <b>Total for Cl</b>  | <b>-1.29021</b>  |                             | <b>Total for Cl</b>  | <b>-1.33862</b>  |
|                             | <i>Total for C</i>   | <i>-17.19110</i> |                             | <i>Total for C</i>   | <i>-20.51660</i> |
|                             | <i>Total for H</i>   | <i>18.14539</i>  |                             | <i>Total for H</i>   | <i>17.98963</i>  |
|                             | <i>Total for all</i> | <i>1</i>         |                             | <i>Total for all</i> | <i>1</i>         |

**Table S11.** Selected Second Order Perturbation theory analysis of Fock matrix in NBO basis for **Au<sub>13</sub>As<sub>8</sub>**.

| <i>Interactions between Au core atoms and Au-Sb <math>\sigma^*</math> bonds with <math>E(2) &gt; 10</math> kcal/mol</i> |                                             |              |           |        |
|-------------------------------------------------------------------------------------------------------------------------|---------------------------------------------|--------------|-----------|--------|
| Donor NBO (i)                                                                                                           | Acceptor NBO (j) [Au/As contribution ratio] | <b>E(2)</b>  | E(j)-E(i) | F(i,j) |
| 702 LP (6) Au1                                                                                                          | 842 BD*(1) Au2-As15 [80/20]                 | <b>18.45</b> | 0.18      | 0.068  |
| 702 LP (6) Au1                                                                                                          | 954 BD*(1) Au9-As16 [80/20]                 | <b>18.45</b> | 0.18      | 0.068  |
| 702 LP (6) Au1                                                                                                          | 927 BD*(1) Au7-As20 [81/19]                 | <b>51.49</b> | 0.18      | 0.111  |
| 702 LP (6) Au1                                                                                                          | 895 BD*(1) Au5-As19 [81/19]                 | <b>51.49</b> | 0.18      | 0.111  |
|                                                                                                                         |                                             |              |           |        |
| 703 LP (7) Au1                                                                                                          | 884 BD*(1) Au4-As18 [81/19]                 | <b>11.35</b> | 0.17      | 0.051  |
| 703 LP (7) Au1                                                                                                          | 948 BD*(1) Au8-As21 [81/19]                 | <b>11.35</b> | 0.17      | 0.051  |
| 703 LP (7) Au1                                                                                                          | 858 BD*(1) Au3-As14 [81/19]                 | <b>28.98</b> | 0.17      | 0.082  |
| 703 LP (7) Au1                                                                                                          | 999 BD*(1) Au12-As17 [81/19]                | <b>28.98</b> | 0.17      | 0.082  |
| 703 LP (7) Au1                                                                                                          | 844 BD*(1) Au2-As15 [80/20]                 | <b>43.54</b> | 0.18      | 0.104  |
| 703 LP (7) Au1                                                                                                          | 956 BD*(1) Au9-As16 [80/20]                 | <b>43.54</b> | 0.18      | 0.104  |
|                                                                                                                         |                                             |              |           |        |
| 704 LP (8) Au1                                                                                                          | 896 BD*(1) Au5-As19 [81/19]                 | <b>20.94</b> | 0.17      | 0.069  |
| 704 LP (8) Au1                                                                                                          | 928 BD*(1) Au7-As20 [81/19]                 | <b>20.95</b> | 0.17      | 0.069  |
| 704 LP (8) Au1                                                                                                          | 858 BD*(1) Au3-As14 [81/19]                 | <b>44.06</b> | 0.16      | 0.100  |
| 704 LP (8) Au1                                                                                                          | 999 BD*(1) Au12-As17 [81/19]                | <b>44.06</b> | 0.16      | 0.100  |
| 704 LP (8) Au1                                                                                                          | 877 BD*(1) Au4-As18 [81/19]                 | <b>60.04</b> | 0.16      | 0.115  |
| 704 LP (8) Au1                                                                                                          | 941 BD*(1) Au8-As21 [81/19]                 | <b>60.05</b> | 0.16      | 0.115  |
|                                                                                                                         |                                             |              |           |        |



| 705 LP (9) Au1                                                                                                          | 884 BD*(1) Au4-As18 [81/19]                | <b>12.19</b> | 0.03      | 0.023  |
|-------------------------------------------------------------------------------------------------------------------------|--------------------------------------------|--------------|-----------|--------|
| 705 LP (9) Au1                                                                                                          | 948 BD*(1) Au8-As21 [81/19]                | <b>12.19</b> | 0.03      | 0.023  |
| 705 LP (9) Au1                                                                                                          | 869 BD*(1) Au3-As14 [81/19]                | <b>13.83</b> | 0.03      | 0.026  |
| 705 LP (9) Au1                                                                                                          | 999 BD*(1) Au12-As17 [81/19]               | <b>13.83</b> | 0.03      | 0.026  |
| 705 LP (9) Au1                                                                                                          | 896 BD*(1) Au5-As19 [81/19]                | <b>14.49</b> | 0.03      | 0.028  |
| 705 LP (9) Au1                                                                                                          | 928 BD*(1) Au7-As20 [81/19]                | <b>14.49</b> | 0.03      | 0.028  |
| 705 LP (9) Au1                                                                                                          | 852 BD*(1) Au2-As15 [80/20]                | <b>16.83</b> | 0.04      | 0.033  |
| 705 LP (9) Au1                                                                                                          | 964 BD*(1) Au9-As16 [80/20]                | <b>16.83</b> | 0.04      | 0.033  |
| <i>Interactions between Au core atoms and As-C <math>\sigma^*</math> bonds with <math>E(2) &gt; 1.5</math> kcal/mol</i> |                                            |              |           |        |
| Donor NBO (i)                                                                                                           | Acceptor NBO (j) [As/C contribution ratio] | E(2)         | E(j)-E(i) | F(i,j) |
| 708 LP(3) Au2                                                                                                           | 843 BD*(1) As15-C26 [63/37]                | 2.36         | 0.50      | 0.031  |
| 709 LP(4) Au2                                                                                                           | 843 BD*(1) As15-C170 [62/38]               | 1.92         | 0.51      | 0.028  |
| 709 LP(4) Au2                                                                                                           | 843 BD*(1) As15-C147 [62/38]               | 1.69         | 0.50      | 0.026  |
| 716 LP(3) Au3                                                                                                           | 859 BD*(1) As14-C63 [62/38]                | 2.25         | 0.50      | 0.030  |
| 717 LP(4) Au3                                                                                                           | 859 BD*(1) As14-C47 [63/37]                | 2.22         | 0.50      | 0.030  |
| 724 LP(3) Au4                                                                                                           | 875 BD*(1) As18-C69 [62/38]                | 2.32         | 0.50      | 0.031  |
| 725 LP(4) Au4                                                                                                           | 875 BD*(1) As18-C226 [62/38]               | 1.76         | 0.50      | 0.027  |
| 725 LP(4) Au4                                                                                                           | 875 BD*(1) As18-C36 [63/37]                | 1.82         | 0.49      | 0.027  |
| 732 LP(3) Au5                                                                                                           | 892 BD*(1) As19-C80 [62/38]                | 2.22         | 0.50      | 0.030  |
| 733 LP(4) Au5                                                                                                           | 892 BD*(1) As19-C192 [63/37]               | 2.38         | 0.50      | 0.031  |
| 749 LP(3) Au7                                                                                                           | 924 BD*(1) As20-C180 [62/38]               | 2.22         | 0.50      | 0.030  |
| 750 LP(4) Au7                                                                                                           | 924 BD*(1) As20-C103 [63/37]               | 2.38         | 0.50      | 0.031  |
| 757 LP(3) Au8                                                                                                           | 939 BD*(1) As21-C246 [62/38]               | 2.32         | 0.50      | 0.031  |
| 758 LP(4) Au8                                                                                                           | 939 BD*(1) As21-C113 [62/38]               | 1.76         | 0.50      | 0.027  |
| 758 LP(4) Au8                                                                                                           | 939 BD*(1) As21-C279 [63/37]               | 1.82         | 0.49      | 0.027  |
| 765 LP(3) Au9                                                                                                           | 955 BD*(1) As16-C125 [63/37]               | 2.36         | 0.50      | 0.031  |
| 766 LP(4) Au9                                                                                                           | 955 BD*(1) As16-C207 [62/38]               | 1.92         | 0.51      | 0.028  |
| 766 LP(4) Au9                                                                                                           | 955 BD*(1) As16-C271 [62/38]               | 1.69         | 0.50      | 0.026  |
| 791 LP(3) Au12                                                                                                          | 794 BD*(1) As17-C160 [62/38]               | 2.25         | 0.50      | 0.030  |
| 792 LP(4) Au12                                                                                                          | 794 BD*(1) As17-C137 [63/37]               | 2.22         | 0.50      | 0.030  |

Note: The isovalue and density of the NBO orbitals were set to 0.01 and 0.0004, respectively.



| <i>Interactions between Au core atoms and Sb-C <math>\sigma^*</math> bonds with <math>E(2) &gt; 1.5</math> kcal/mol</i> |                                            |      |           |        |
|-------------------------------------------------------------------------------------------------------------------------|--------------------------------------------|------|-----------|--------|
| Donor NBO (i)                                                                                                           | Acceptor NBO (j) [Sb/C contribution ratio] | E(2) | E(j)-E(i) | F(i,j) |
| 587 LP(3) Au1                                                                                                           | 716 BD*(1) Sb8-C56 [69/31]                 | 1.84 | 0.48      | 0.027  |
| 588 LP(4) Au1                                                                                                           | 716 BD*(1) Sb8-C50 [69/31]                 | 1.76 | 0.47      | 0.026  |
| 595 LP(3) Au2                                                                                                           | 732 BD*(1) Sb9-C62 [69/31]                 | 2.00 | 0.48      | 0.028  |
| 596 LP(4) Au2                                                                                                           | 732 BD*(1) Sb9-C74 [69/31]                 | 1.81 | 0.47      | 0.026  |
| 603 LP(3) Au3                                                                                                           | 747 BD*(1) Sb12-C158 [69/31]               | 1.80 | 0.48      | 0.026  |
| 604 LP(4) Au3                                                                                                           | 747 BD*(1) Sb12-C152 [69/31]               | 1.98 | 0.47      | 0.028  |
| 638 LP(3) Au13                                                                                                          | 866 BD*(1) Sb7-C38 [69/31]                 | 2.01 | 0.47      | 0.028  |
| 639 LP(4) Au13                                                                                                          | 866 BD*(1) Sb7-C26 [69/31]                 | 1.59 | 0.47      | 0.025  |
| 646 LP(3) Au14                                                                                                          | 649 BD*(1) Sb10-C86 [69/31]                | 1.99 | 0.47      | 0.028  |
| 647 LP(4) Au14                                                                                                          | 649 BD*(1) Sb10-C92 [69/31]                | 1.71 | 0.47      | 0.026  |
| 663 LP(4) Au16                                                                                                          | 914 BD*(1) Sb11-C116 [69/31]               | 2.03 | 0.47      | 0.028  |
| 654 LP(3) Au15                                                                                                          | 898 BD*(1) Sb20-C98 [69/31]                | 1.57 | 0.48      | 0.025  |
| 655 LP(4) Au15                                                                                                          | 898 BD*(1) Sb20-C104 [69/31]               | 1.98 | 0.48      | 0.028  |
| 670 LP(3) Au17                                                                                                          | 930 BD*(1) Sb21-C140 [69/31]               | 1.68 | 0.48      | 0.026  |
| 671 LP(4) Au17                                                                                                          | 930 BD*(1) Sb21-C146 [69/31]               | 1.89 | 0.47      | 0.027  |

Note: The isovalue and density of the NBO orbitals were set to 0.01 and 0.0004, respectively.

**Table S13.** Selected Wiberg bond indices in the NAO basis for  $\text{Au}_{13}\text{As}_8$  and  $\text{Au}_{13}\text{Sb}_8$ .

| $\text{Au}_{13}\text{As}_8$                                                       |               | $\text{Au}_{13}\text{Sb}_8$                                                        |               |
|-----------------------------------------------------------------------------------|---------------|------------------------------------------------------------------------------------|---------------|
| 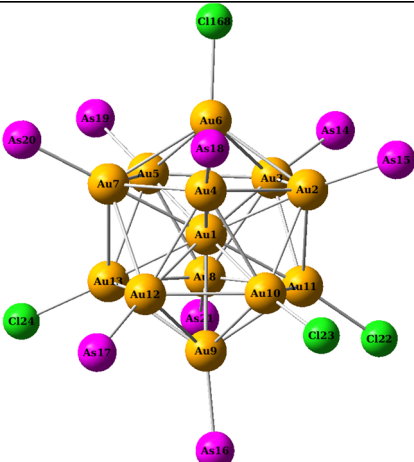 |               |  |               |
| <b>Au-As bonds</b>                                                                |               | <b>Au-Sb bonds</b>                                                                 |               |
| Au12-As17                                                                         | 0.4489        | Au3-Sb12                                                                           | 0.5414        |
| Au8-As21                                                                          | 0.4486        | Au17-Sb21                                                                          | 0.5408        |
| Au9-As16                                                                          | 0.4823        | Au16-Sb11                                                                          | 0.5363        |
| Au3-As14                                                                          | 0.4489        | Au15-Sb20                                                                          | 0.5727        |
| Au5-As19                                                                          | 0.4549        | Au14-Sb10                                                                          | 0.5363        |
| Au7-As20                                                                          | 0.4549        | Au2-Sb9                                                                            | 0.5324        |
| Au4-As18                                                                          | 0.4486        | Au13-Sb7                                                                           | 0.5280        |
| Au2-As15                                                                          | 0.4823        | Au1-Sb8                                                                            | 0.5658        |
| <b>Average</b>                                                                    | <b>0.4587</b> | <b>Average</b>                                                                     | <b>0.5442</b> |
| <b>Au-Cl bonds</b>                                                                |               | <b>Au-Cl bonds</b>                                                                 |               |
| Au13-Cl24                                                                         | 0.4073        | Au19-Cl25                                                                          | 0.4087        |
| Au11-Cl22                                                                         | 0.4468        | Au4-Cl22                                                                           | 0.4015        |
| Au10-Cl23                                                                         | 0.4468        | Au18-Cl24                                                                          | 0.4355        |
| Au6-Cl168                                                                         | 0.3696        | Au5-Cl23                                                                           | 0.4380        |
| <b>Average</b>                                                                    | <b>0.4176</b> | <b>Average</b>                                                                     | <b>0.4209</b> |

## References

- [1] Rigaku Oxford Diffraction. CrysAlisPro Software system, version 1.171.40.25a, Rigaku Corporation: Oxford, UK, 2018.
- [2] L. Palatinus and G. Chapuis, *J. Appl. Crystallogr.*, 2007, **40**, 786-790.
- [3] O. V. Dolomanov, L. J. Bourhis, R. J. Gildea, J. A. K. Howard and H. Puschmann, *J. Appl. Crystallogr.*, 2009, **42**, 339-341.
- [4] G. M. Sheldrick, *Acta. Crystallogr., Sect. C.*, 2015, **71**, 3-8.
- [5] A. L. Spek, *Acta. Crystallogr. Sect. D.*, 2009, **65**, 148-155.
- [6] Gaussian 16, Rev. B.01, M. J. Frisch, G. W. Trucks, H. B. Schlegel, G. E. Scuseria, M. A. Robb, J. R. Cheeseman, G. Scalmani, V. Barone, G. A. Petersson, H. Nakatsuji, X. Li, M. Caricato, A. V. Marenich, J. Bloino, B. G. Janesko, R. Gomperts, B. Mennucci, H. P. Hratchian, J. V. Ortiz, A. F. Izmaylov, J. L. Sonnenberg, Williams, F. Ding, F. Lipparini, F. Egidi, J. Goings, B. Peng, A. Petrone, T. Henderson, D. Ranasinghe, V. G. Zakrzewski, J. Gao, N. Rega, G. Zheng, W. Liang, M. Hada, M. Ehara, K. Toyota, R. Fukuda, J. Hasegawa, M. Ishida, T. Nakajima, Y. Honda, O. Kitao, H. Nakai, T. Vreven, K. Throssell, J. A. Montgomery Jr., J. E. Peralta, F. Ogliaro, M. J. Bearpark, J. J. Heyd, E. N. Brothers, K. N. Kudin, V. N. Staroverov, T. A. Keith, R. Kobayashi, J. Normand, K. Raghavachari, A. P. Rendell, J. C. Burant, S. S. Iyengar, J. Tomasi, M. Cossi, J. M. Millam, M. Klene, C. Adamo, R. Cammi, J. W. Ochterski, R. L. Martin, K. Morokuma, O. Farkas, J. B. Foresman and D. J. Fox, Wallingford, CT, 2016.
- [7] C. Adamo and V. Barone, *J. Chem. Phys.*, 1998, **108**, 664-675.
- [8] Q. S. Li, B. Xu, Y. M. Xie, R. B. King and H. F. Schaefer, *Dalton Trans.*, 2007, 4312-4322.
- [9] P. J. Hay and W. R. Wadt, *J. Chem. Phys.*, 1985, **82**, 299-310.
- [10] M. J. Frisch, J. A. Pople and J. S. Binkley, *J. Chem. Phys.*, 1984, **80**, 3265-3269.
- [11] Y.-Z. Li, R. Ganguly, K. Y. Hong, Y. Li, M. E. Tessensohn, R. Webster and W. K. Leong, *Chem. Sci.*, 2018 **9**, 8723-8730.
- [12] T. Lu and F. Chen, *J. Comput. Chem.*, 2012, **33**, 580-592.
- [13] M.-C. Brandys, M. C. Jennings and R. J. Puddephatt, *J. Chem. Soc. Dalton*, 2000, 4601-4606.
- [14] Y.-Z. Li and W. K. Leong, *RSC Adv.*, 2019, **9**, 5475-5479.
- [15] N. A. Barnes, K. R. Flower, S. M. Godfrey, P. A. Hurst, R. Z. Khan and R. G. Pritchard, *CrystEngComm.*, 2010, **12**, 4240-4251.

- [16] R. C. B. Copley and D. M. P. Mingos, *J. Chem. Soc. Dalton*, 1996, 491-500.
- [17] Y. Shichibu, K. Suzuki and K. Konishi, *Nanoscal*, 2012, **4**, 4125-4129.
- [18] Z. Lei, J. J. Li, Z. A. Nan, Z. G. Jiang and Q. M. Wang, *Angew. Chem. Int. Ed.*, 2021, **60**, 14415-14419.
- [19] L. C. McKenzie, T. O. Zaikova and J. E. Hutchison, *J. Am. Chem. Soc.*, 2014, **136**, 13426-13435.
